## RESEARCH ARTICLE

# Ethnomedicinal and folklore inventory of wild plants used by rural communities of valley Samahni, District Bhimber Azad Jammu and Kashmir, Pakistan

Muhammad Ishtiaq<sup>1\*</sup>, Mehwish Maqbool<sup>1</sup>, Muhammad Ajaib<sup>1</sup>, Maqsood Ahmed<sup>1</sup>, Iqbal Hussain<sup>2</sup>, Humaira Khanam<sup>1</sup>, Waheeda Mushtaq<sup>1</sup>, Tanveer Hussain<sup>1</sup>, Shehzad Azam<sup>1</sup>, Khizar Hayat Bhatti<sup>3</sup>, Abdul Ghani<sup>4</sup>

**1** Department of Botany, Mirpur University of Science and Technology (MUST), Mirpur, Azad Jammu & Kashmir, Pakistan, **2** Department of Botany, Government College University Faisalabad, Faisalabad, Pakistan, **3** Department of Botany, University of Gujrat, Ahmedabad, Pakistan, **4** Department of Botany, University of Sargodha, Sargodha, Pakistan

\* [drishtiaq.bot@must.edu.pk](mailto:drishtiaq.bot@must.edu.pk), [drishtiaqajk@gmail.com](mailto:drishtiaqajk@gmail.com)

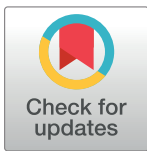

## OPEN ACCESS

**Citation:** Ishtiaq M, Maqbool M, Ajaib M, Ahmed M, Hussain I, Khanam H, et al. (2021) Ethnomedicinal and folklore inventory of wild plants used by rural communities of valley Samahni, District Bhimber Azad Jammu and Kashmir, Pakistan. PLoS ONE 16(1): e0243151. <https://doi.org/10.1371/journal.pone.0243151>

**Editor:** Khawaja Shafique Ahmad, University of Poonch Rawalakot, PAKISTAN

**Received:** June 18, 2020

**Accepted:** November 16, 2020

**Published:** January 13, 2021

**Copyright:** © 2021 Ishtiaq et al. This is an open access article distributed under the terms of the [Creative Commons Attribution License](https://creativecommons.org/licenses/by/4.0/), which permits unrestricted use, distribution, and reproduction in any medium, provided the original author and source are credited.

**Data Availability Statement:** All relevant data are within the manuscript and its [Supporting Information](#) files are attached as Figures, cover letter, field permit letter, ethical committee letter, plagiarism report for reference, other supporting letter for reply of queries of reviewers/editorial board.

**Funding:** The author(s) received no specific funding for this work.

## Abstract

The current study describes ethnobotanical (EB) and traditional ethnomedicinal (TEMs) uses of medicinal plants (MPs) of Tehsil Samahni area of Azad Jammu and Kashmir, Pakistan. Indigenous inhabitants of the area mostly reside in remote mountainous areas and depend on wild plants for life necessities and treatment of different diseases. This paper presents first quantitative ethnobotanical study describing the popularity level of MPs in indigenous communities by using relative popularity level (RPL) and rank order of priority (ROP) indices. The data of TEMs and EB uses were collected from 200 interviewees consisting of traditional herbal practitioners (110) and farmers (90) from study area using structured and semi-structured interview methodology during year 2019. It was found that illiterate peasants have more knowledge and practice of TEMs than other people. A total of 150 plant species belonging to 58 families with botanical and local names, parts used, mode of recipes preparation, administration mechanism and TEMs uses were documented in systematic manner. It was explored that highest number (7.69%) of plants of Moraceae were used in TEMs and followed by species of Asteraceae (6.29%). The ethnobotanical data was analyzed by using quantitative ethnobotanical tools viz: informant consensus factor (ICF), fidelity level (FL), relative frequency of citation (RFC), use value index (UVI), relative importance of plants (RIP), relative popularity level (RPL) and rank order of popularity (ROP). The leaf ranked first (36.49%) and fruit 2<sup>nd</sup> (12.07%) being used in TEMs while prevalent use-form was decoction (29.28%), followed by tea (23.05%) and preferably taken as oral (46.66%). ICF analysis proved that diabetes, hypertension, rabies, snake sting and joint pains were the most prevalent occurring infirmities. The highest RFC (0.95) was found for *Acacia modesta*, followed by *Boerhavia procumbens* (RFC:0.87) and *Berberis lycium* (RFC:0.85). The relative importance of MPs was calculated by using UVI and *Moringa oleifera* showed highest (1.38), followed by *Zanthoxylum armatum* (1.25) and *Withania somnifera* (1.24) use-values. High UVI of plants depicts that these species are predominantly

**Competing interests:** The authors have declared that no competing interests exist.

used in local health care system. The plants *Phyllanthus emblica*, *Morus macruora*, *Justicia adhatoda* and *Melia azedarach* depicted high values (1.00) of FL and RPL proving that these taxa are commonly used in indigenous medicines by local inhabitants and have better potential for drug discovery by ethnopharmacological analysis. Out of total, 26 species had more than 50% ROP index and *Phyllanthus emblica* and *Flacourtia indica* (ROP = 100) followed by *Morus macruora* (ROP: 97) were used to cure ‘hypertension and hyperlipidemia’ and ‘cough, chest infection’, respectively. It was found that 30% of total species were previously reported as medicinal while 70% plants were first time reported to be used in TEMs and authenticated by using of quantitative ethnobotanical tools. Ethnopharmacological potential of indigenous plants was confirmed by RIP and RPL indices which had been used to cure one or more body systems and were promulgated in the local herbal medicine system. The research provides clues to screen these plant species by using latest phytochemical and pharmacological analysis for novel drug discovery. This study will also be useful for conservation of bioculture traditional knowledge of indigenous communities and the most important is to conserve medicinal plants of the study area for future generations.

## Introduction

Plants have been playing a pivotal role in human life because man has been dependent on plants for his requirements and necessities like: food, fodder, fuel, medicines, forage, shelter and aesthetics etc [1–3]. In different regions of world, particularly in rural areas medicinal plants have been utilized to cure and eradicate various diseases and epidemics [4]. About 80% population of the developing countries of world, primarily depends on traditional ethnomedicines (TEMs) or herbal medicines for cure of different diseases [5, 6]. TEMs studies have been of vital significance in discovering of contemporary and targeted allopathic drugs from indigenous medicinal plants (MPs). The ethnobotanical (EB) research on any area provides valuable information about the MPs flora which may be harvested for novel drug discovery through pharmaceutical research [7, 8]. The previous studies provide reference that traditional medical phytonyms’ knowledge has contributed keystone role in development of many vital allopathic drugs from the plants [9, 10].

It is estimated that nearly 25% of allopathic medicines have been obtained solely or synergistically from plants and many western drugs are manufactured by using them as ‘model’ production for synthetic and semi-synthetic drugs using dedicated techniques [11]. It is popularized that conventional or allopathic medicines can cause strong side effects if used wrongly whilst herbal or botanic medicines are considered as inexpensive, pure, easily-accessed and safer [12–14].

Pakistan is situated in south Asian region with an area of 884,000 Km<sup>2</sup> occurring between 25°–38° N, and 62°–76° E. [15]. Azad Jammu and Kashmir territory is one part of whole territory of state of “Kashmir” and it is interesting to narrate that word “Kashmir” means “land desiccated from water” whilst Hindu myth states “Sage Kashyapa drained a lake to produce the land” [16]. The third group of researchers describe that “Kashmir is the valley present between the Peer Panjaal mountainous range and great Himalayas”. The valley is very beautiful, fascinating and Mughal emperor ‘Muhammad Salim Khan’ known as “Jahanghir” declared that “if paradise could be searched in this world anywhere which is Kashmir”. This predicts that plant biodiversity of Kashmir is un-parallel with any other part of earth [17, 18]. The area of Azad

Jammu and Kashmir is 13297Km<sup>2</sup> with population of 4.2 million. Administratively, Azad Kashmir is divided into ten (10) Districts (administrative units) and Bhimber is one of the districts located at junction with Punjab province. “Etymology of Bhimber” is based on name of its founder/conqueror “Raja Boom Khan” with commemoration as “Bhoom chand” or “Bhoom-pur” and later on, known as “Bhimber” state.

District Bhimber is also called “Bab-e-Kashmir”- the “gateway or door” because it attaches Pakistan with Kashmir and all past time rulers entered in “state of Kashmir” and India (sub-continent) through this city/district. The total area of the district is 1516 Km<sup>2</sup> which is administratively divided into three subdivisions called Tehsils; Barnala, Bhimber and Samahni [19]. There are different races and people living in it but major ethnic groups are viz: Jat, Rajpot, Mirza, Malik, Bhatti, Jaraal, Kashmiri/Bhatt, Awan, Sheikh, Syed and Gojar. The prevalently spoken language is “Hindko” while “Urdu” is known as the *lingua franca* of Bhimber and other parts of AJK; other languages spoken in the area include viz: English, Dogri, Kashmiri, Punjabi, Potohari, Saraikkee and Pashto [20].

The rationale of study is based on facts that the area under research is mostly mountainous and has many hilly terrains populated by different ethnic groups with specific biocultural paradigm. These indigenous people of the area depend on local plants for their life sustenance and traditional medicines to treat various diseases. The practise of use of herbal or green medicines (GMs) is also well promulgated in different areas of the world. The people of the study area prefer to use TEMs due to cost-effective, accessible, safe and affordable to prepare in home [21, 22]. It is known that approximately 85% traditional medicines used around the globe are botanic in origin prepared from one or more plants species according to folklore recipes [23]. Hence, it is envisaged that MPs are the indigenous phytoheritage or bioheritage and nearly 50,000 plant species are known for their use in TEMs in different traditional medicine systems of the world [24–26]. Currently, research on traditional herbal medicines is gaining great attention of the world scientific community and in Pakistan many researchers have been working on TEMs of local plants [27–29]. In AJK territory, sporadic research work on TEMs of plant origin have been reported in different ethnobotanical articles [30–33] and on District Bhimber few researchers have conducted the descriptive EB research work [34–40] while hitherto no comprehensive quantitative ethnobotanical research has been conducted on this study area. The present study is focused on documentation of traditional knowledge of indigenous communities of Tehsil Samahni on wild MPs of the area. The purpose of the research was aimed to: (i) to explore and document traditional knowledge of local inhabitants of rural areas about use of wild plants in traditional ethnomedicines (TEMs), (ii) to collect and compile the data of TEMs along with mode of preparation, use-form, parts used, folklore recipes used by local herbalists, (iii) to authenticate the data of TEMs by using quantitative tools like RPL, ROP, ICF, UVI, FL and RFC in order to explore the most prevalently used species in TEMs and to recommend it for further ethnopharmacological screening for drug discovery and development and (iv) to give recommendations for conservation of wild medicinal plants endemic in the area.

## Materials and methodologies

(flowchart of methodology is presented in Fig 2).

## Description of the study area

Azad Jammu Kashmir state is divided into ten administrative units called Districts and Bhimber is one of these districts. Edaphologically it is linked with Gujrat (Pakistan) on south, Mirpur western-side while on eastern and north-east side it is linked with Indian Kashmir

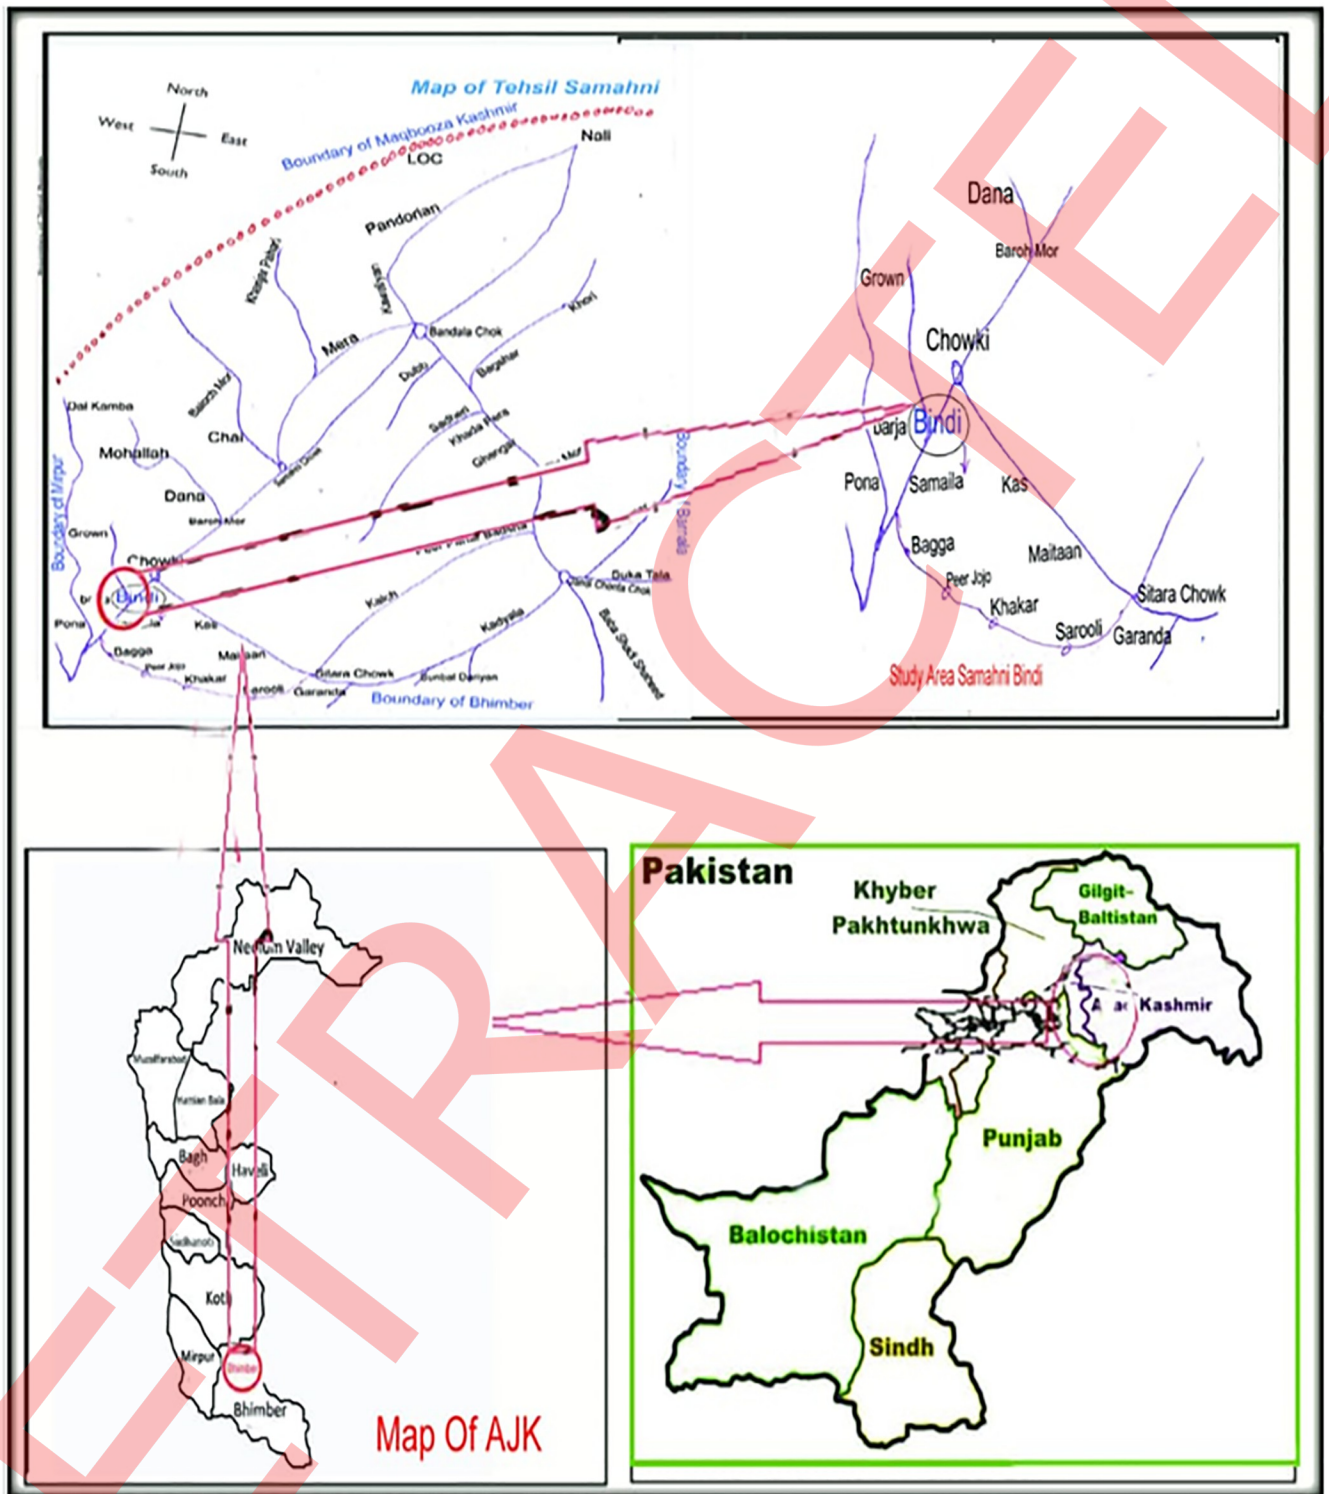

Fig 1. Map of study area Tehsil Samahni (District Bhimber) of Azad Jammu & Kashmir, Pakistan.

<https://doi.org/10.1371/journal.pone.0243151.g001>

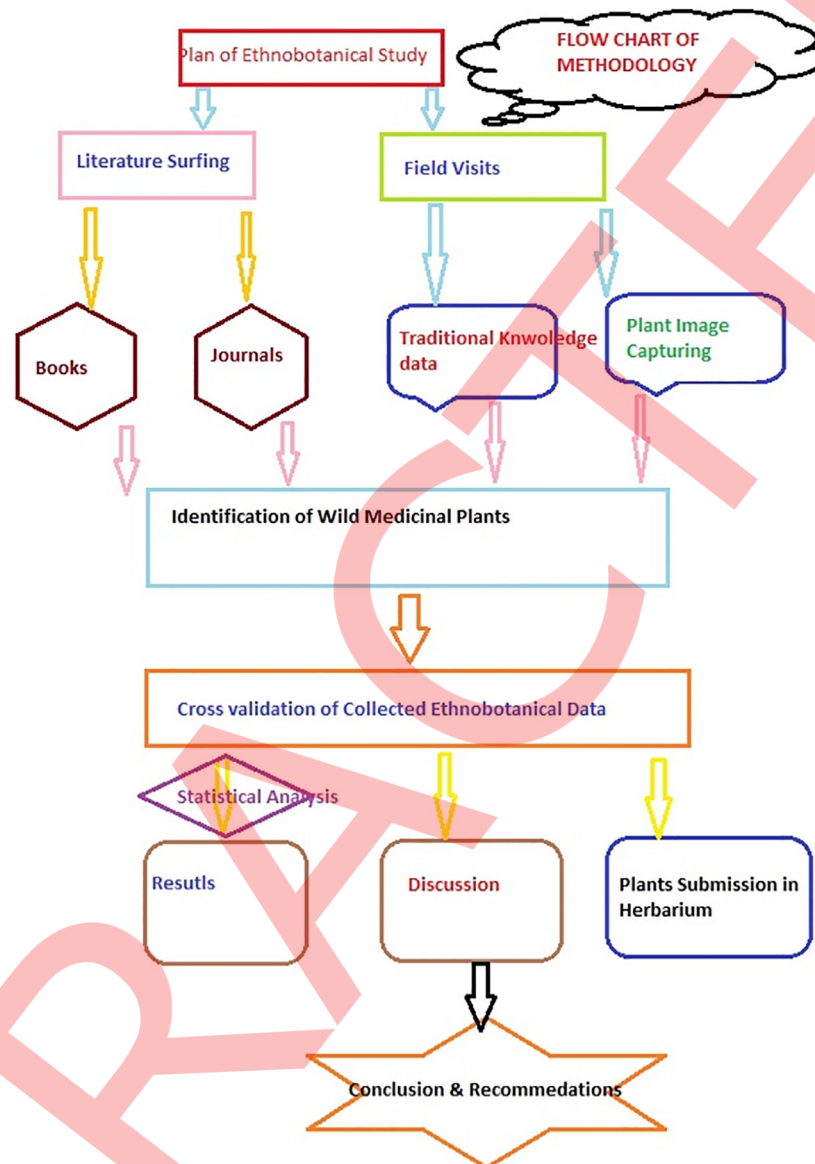

Fig 2.

<https://doi.org/10.1371/journal.pone.0243151.g002>

(District Jammu and Rajori) and on north-west is District Kotli. It demarcates that area has diverse bioculture and different communities reside in the area. So, due to unique geographic location of District Bimber; the area is archaeologically very rich with cultural amalgam of different regions and ethnicity of the past eras (Fig 1). To visit the Kashmir valley, the Mughal Emperors usually used this route passing through the area for travelling [41]. The current research project is conducted in subdivision Samahni of District Bimber of AJK. Geographic coordinates describe that Bimber is located between latitude 32–48 to 33–34 and longitude 73–55 to 74–45 degree with area of 1516 Km<sup>2</sup>, altitude of 1118 ft from sea level inhabiting population of ca. 4500,000 [42].

Bimber city has distance of 50 Km from Mirpur, 48 Km from Gujrat (Pakistan) 166 Km Islamabad (Pakistan) and 241 Km from Srinagar (Indian Occupied Kashmir) [43]. Bimber is

located in hub or lap of Shiwalik mountainous range with high rainfall in Feb-March but peak is seen in monsoon season (July to August). The average rainfall is ca. 1233 mm per month and hailing occurs in months of February and July [44]. Temperature of the area ranges upto 45°C in summer (May-June) while remains cold in winter and humidity content usually is high during rainy and winter seasons (69%) [44]. Anthropological survey describes that the area has diverse ethnicity and famous casts residing include viz: Jat, Mirza, Malik, Rajpot, Bhati, Sheikh, Syed and Gojars while Jat and Rajpot are main ethnic groups having high population and land resources [45]. Other minorities use land of these big tribes for agriculture purpose because they have very little land of their own. Many people live in mountains and/or near mountains, so they get their needs of food, fodder, construction wood and fuel from natural resources (forests) [46]. According to one point of view historians “Kashmiri people” belong to one ancestral ethnic group called “Dardic” who was known as Indo-Aryan prevalently living in east-border of Afghanistan and northern areas of Pakistan and India. Currently, 90% population of Bhimber has “Punjabi” ancestors with closest religious, cultural and geographical relations to Potohar-belt inhabitants [47, 48]. The commonly spoken language is “Hindko or Saraeki” which is influenced by Punjabi language due to its neighborhood and the known languages spoken consist of: Urdu, English, Dogri, Kashmiri, Punjabi, Potohari, Saraikkee and Pashto. Pashto is also used by migrant Afghan communities who came here in 1989–90, known as “War Displayed Persons (WDPs)” as shown in map of study area (Fig 1) and now living here in District Bhimber to earn their livelihood [45].

### Ethnomedicinal data compilation and authentication

Ethnomedicinal use data of wild medicinal plants was gathered from the local informants using structured and semi-structured interview methodology with documentation of the information in questionnaire form during year-2019 (Fig 2). About 200 informants comprising of both male (120) and female (80) were involved in the study and during all trips one male and one female guide or translator was accompanied because rural and mountainous people use different languages and dialects, hence it was very important to use indigenous translator to know the real knowledge about indigenous flora from the native communities [49–52]. The interviewees were farmers, house-women, midwives, herbalist and traditional phytotherapist (TPT) while it has been seen that most of the people were illiterate or had very basic education and only few had graduation level literacy; thus extracting diverse and maximum knowledge of TEMs from the indigenous communities. In the research trips not only traditional knowledge of TEMs was documented but also plant specimens were collected with guidance of local people describing their native names and tonic preparation methods were narrated in field notebook. For this study, interviewees were selected gender free manner and each collected plant was showed to “five or more” individuals and asked to tell their ethnomedicinal, ethnobotanical uses and occurrence place with population density of each species. In this procedure, if same data or information about the species was described by three or more than three persons (>60%) then it was declared “authentic” and included in the study for better reliability and further research analysis. However, the less information collected about certain plants does not mean that they are of less significance in TEMs, that might be due to reason that traditional ethnomedicinal knowledge (TEK) about wild plants is gradually disappearing in younger generations or population of the plants is becoming scarce day by day due to various threatening factors [53, 54]. For proper authentication of the ethnomedicinal data, the botanical and local names with family of each plant were verified manually with herbarium specimens, taxonomic literature (hard and soft form), manuals, Flora of Pakistan and cross checked with online data from the plant list website or flora of Pakistan & literature [55–59]. All

collected plants were brought under standardized voucher numbering system with labels and cross-referenced with field notebook (FNB) record to further validate their authenticity [60–62]. All gathered ethnomedicinal data of plants was presented in alphabetical order comprising of botanical names, common names, family, plant parts, preparation mode, administration method, diseases cured and other ethnobotanical uses promulgated in the study area. During the field surveys, plants specimens were collected properly (having flowers, fruit or both) and preserved according to the standard process for herbarium (MUH) [47, 63]. The herbarium specimens were prepared according to protocol of previous researchers like Seshagirirao *et al.*, (2016), Vitalini *et al.*, (2013) and Ishtiaq *et al.*, (2010a) [39, 64, 65] and deposited in the herbarium of the Department of Botany with proper voucher number allotment for future reference because they will assist taxonomy students and researchers to identify the required species for further collection from same and/or other areas of the study area and Azad Kashmir regions [66, 67]. The collected plant specimens were properly identified using Flora of Pakistan data “[www.eflora.com](http://www.eflora.com)”, the plant list “[www.theplantlist.org](http://www.theplantlist.org)” and comparing with printed Flora book [68, 69]. Whereas another website named “International Plant Name Index” with webpage “[www.ipni.org](http://www.ipni.org)” was used for cross checking of botanical and family names of the plants [70]. The collected plants were identified by Dr. Muhammad Ajaib; a taxonomist of the Department of Botany and all prepared herbarium vouchers bearing code “MUH-”, were kept in herbarium, Department of Botany Mirpur University of Science and Technology (MUST), Bhimber Campus, AJK, Pakistan for future reference.

### Ethical statement

The official permission of plan regarding field study and collection of plants from wild areas and Forest zones of Samahni, District Bhimber of AJK was obtained from departmental ethical committee (DEC) duly counter signed by convener of institutional ethical committee.

### Field permit number of field study

The study of plants and their collection from wild forest areas of Samahni (AJK) for experimental and herbarium specimen preparation was prior approved from the concerned head of Forest Department with proper permit number vide: DFO/1277/2019; dated: 02/01/2019. The right of obedience of forest rules was fully followed as per SOPs provided by the relevant office.

### Quantitative analysis

In the research, quantitative ethnobotanical (EB) and ethnomedicinal (EM) data was collected through questionnaire process, tabulated in matrix form and analysed through statistical tools following methodology of previous ethnobotanists (Cook, 1995; Amjad *et al.*, 2017; Ishtiaq *et al.*, 2013b) [47, 54, 57, 71]. Stringent scrutiny was applied for extraction and compilation of the authentic information about the flora of District Bhimber of AJK. The authenticity, replicability and reliability of collected EB and EM information were rechecked by using the following microstatistical tools like: “informant consensus factor” (ICF), “fidelity level” (FL), “relative importance of plant” (RIP), “use value index” (UVI), “relative frequency of citation” (RFC), “relative popularity level” (RPL) and “rank order of priority” (ROP) following the procedures previous researchers like Ishtiaq *et al.*, (2007b) and Mesfin, *et al.*, (2009) [61, 71, 72].

### Informant consensus factor (ICF)

Informant consensus factor was calculated for every category or group of diseases to determine the consensus value of informants on the reported ethnomedicinal uses for the group of

diseases and later on various infirmities were categorized in different groups. ICF was calculated by the following formula:

$$ICF = \frac{N_{ur} - N_t}{N_{ur} - 1}$$

where  $N_{ur}$  is number of use citations in each category/group minus (-)  $N_t$  that is total number of plant species used; divided (/) by the number of use citations in each category minus one as per given formula above [57, 73–75]. This maximum value in ICF is one (01), if experimental values are one or near to one then it means that reported plant species are prevalently used by major part of the local communities confirming their authenticity regarding the ailments' cure. If ICF value is zero (0) or near to zero then it confirms that local people randomly use the plant (s) to treat the cited infirmity [57, 62, 76].

### Fidelity level (FL)

The fidelity level of the data was calculated which depicts the percentage (%age) of interviewees claiming any use of a particular plant for the same major purpose or field and total number of commonly reported usages or ailments. It was calculated according to formula:

$$FL(\%) = \frac{N_p}{N} \times 100$$

whereas;  $N_p$  depicts number of informants, who claimed a particular use of a plant species used for a typical disease and  $N$  means that number of informants/interviewees who used the plants as an ethnomedicine to treat given diseases [57, 77, 78].

### Relative popularity level (RPL)

The relative popularity level index of the plants was calculated to assure and re-affirm obtained FL statistical values of the plants. Sometime, FL cannot be explained properly, particularly when it provides similar values although above 50%, then there is need of a correction factor and RPL is used for this purpose. RPL usually ranges between 0–1 showing lowest and highest range. If its value is one or near to it, then it proves that plant species is frequently used to cure the disease and vice versa [62, 79–81]. It is known that number of uses increases when number of informants rises because of correlation coefficient factor  $r = 0.10$ . For example, if one plant species is cited by more 25 or more informants as ethnomedicines then its RPL rank is raised and RPL is determined as percentage of ( $I_u/25$ ); score one (1) is assigned if cited or mentioned by the half or more number (12) of total informants that was 25 and plant species used to cure any disease is known as popular (“P”) medicinal plant in the area. If any plant is cited by less than 12 informants then RPL value will be ranked as unpopular (“UP”) [62, 82]. The marginalized value between ‘P and UP’ of the plant is the point where if informants number is increased then number of medicinal uses per plant species does not rise.

### Rank order popularity (ROP)

ROP is used as correction factor when FL and RPL values were different from each other and for proper rank order determination. The ROP was calculated by using formula  $ROP = FL \times RPL$ , where ROP value depicts high level or order of popularity of MPs in the specific disease [62, 83]. These two tools (RPL and ROP) of EB study are commonly used for determination of usefulness of different MPs to cure diseases in the local area by indigenous communities.



### Use value index

The use value index (UVI) demarcates relative importance of different uses of the specific species. It was determined by using past cited formula following Vijayakumar *et al.*, (2015) protocol [62, 84].

$$UV_i = \frac{\sum U_i}{N}$$

whereas UV indicates “relative use value” of the single species; “U” is the ‘number of uses mentioned by each informant for the species and “N” is the ‘total number of informants who reported that species.

### Relative frequency of citation (RFC)

Relative frequency of citation is used an index to explore significance or importance of each species occurring in the local area. RFC was determined by “dividing the number of informants” confirming the frequency of citation (FC) by “total number of informants” who participated in survey according formula of Vijayakumar *et al.*, (2015) [62, 84–86].

$$RFC = \frac{FC}{N}$$

whereas ‘0 < RFC > 1’; and FC is the ‘number of informants’ reporting use of a particular species and N is the ‘total number of informants’ involved in study survey.

### Relative importance of plant (RIP)

The pharmacological or pharmaceutical significance of each plant in local culture was determined by using relative importance (RIP) term and it was determined by the following formula as following protocol of Umair *et al.* [62] and Amjad *et al.* [59].

$$RIP = \frac{\text{Rel. Ph} + \text{Rel. B.S.} \times 100}{2}$$

whereas Ph. is pharmacological features of the plants and Rel. Ph. is relative pharmacological importance; rel. BS is body system treated. The relative Pharmacological significance can be calculated by the given below formula.

$$\text{rel.Ph} = \frac{\text{Ph. of given Plant}}{\text{Ph of all reported plant species}}$$

whereas Ph. is pharmacological attributes of the each provided plant and rel. Ph. is the relative number of pharmacological properties referenced for an individual plant.

$$\text{rel.BS} = \frac{\text{BS of given Plant}}{\text{BS of all reported plant species}}$$

whereas BS is the number of body system healed by single species and rel. BS is relative number of body system treated by the given plant species.

## Results and discussion

### Demographic features of the informants

In this study ethnomedicinal and ethnobotanical information of 150 local plants from Samahni valley of District Bhimber of AJK was collected from 200 local informants who

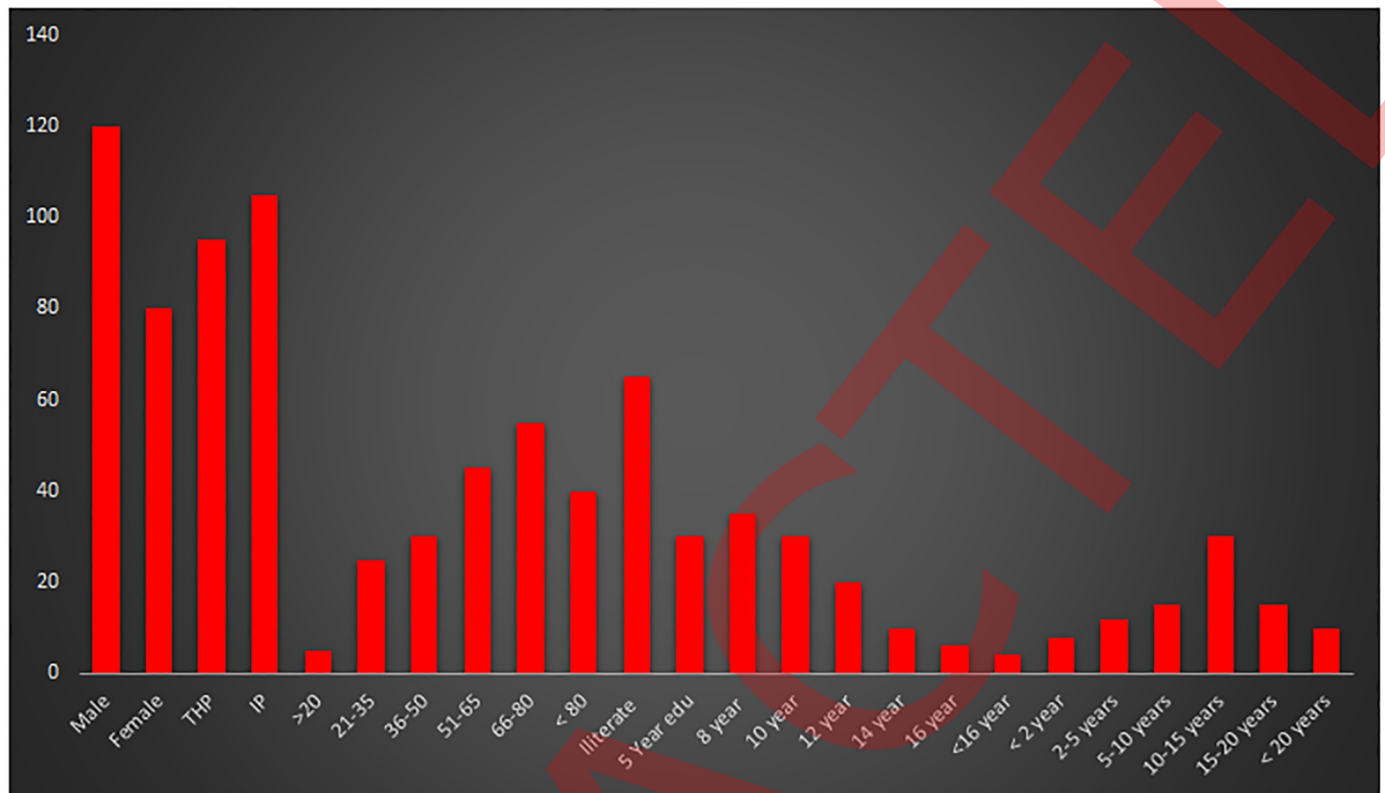

**Fig 3. Informants data depicting the demographic features in Valley of Samahni, AJK, Pakistan.**

<https://doi.org/10.1371/journal.pone.0243151.g003>

consisted of two types (i) 110 traditional herbal therapists (THP) and 90 indigenous people (IP) from different villages and local markets. The demographic information was fractionated into different categories which are presented Fig 3. In the survey, it was found that mostly male informants have more knowledge of TEMs than female respondents. The reason of this difference may be due the fact that male can easily learn education of TEMs from ancestors and also male are more friendly in dissemination of traditional ethnomedicinal knowledge (TEK) about the local plants than female practitioners. Secondly, females of the rural areas were reluctant and shy in information sharing due to conventional family cultural and religious customs of the area [87]. It was found that traditional herbal practioners (THPs) have more information of TEK about the wild MPs than laymen or farmers. The indigenous people (IP) who comprises of various subgroups such as farmers, midwives, teachers, house-wives and shepherds also depicted good amount of TEK but have restricted approach for proper identification of wild MPs of the area as per scientific criterion; however they knew all or maximum local names of the plants. They use MPs not only at their own homes as food phytonyms and tonics but also sale to herbal doctors and local markets traders to earn money. It was seen that THPs with experience of 10–15 years had highest (33%) TEMs knowledge, followed by experience group of 15–20 years (16.6%). It was found that illiterate people had more information of TEMs because they follow traditional cultural rituals more prevalently with great passion and belief than educated inhabitants [46, 87]. A common trend was seen that with rise of education level, there was decline in TEK and use of TEMs that may be due to fact that literate people prefer to use allopathic medicines because they can afford to buy these medicines and prefer prompt relief from infirmities. It was also found that old people have more information

about the MPs and TEMs than young community because they spent long time with their ancestors and used TEMs for disease cure [46]. It was seen that indigenous old and illiterate communities have more belief or trust in TEMs and use of MPs in their daily to cure different infirmities and similar studies had been cited in the past studies in Azad Kashmir [1, 3, 6, 15, 59, 117], Pakistan [2, 4, 83, 114] and other countries as well [21, 88, 89].

### Family index depicting distribution patterns of medicinal plants

The study revealed ethnomedicinal and ethnobotanical uses of 150 plants being promulgated by indigenous people of the area. These plants belonged to 58 families with Moraceae had highest value (7.69%), followed by Asteraceae with 6.29%, Poaceae and Euphorbiaceae 5.59% each (Table 1).

These above stated families are the most prevalent and dominant in the study area proving that MPs of these families are prevalent in the area and easily accessible to the local communities. The prevalence of these families in TEK of the area means that plants of these families have good quantity of phytoconstituents and local inhabitants have been using these for long time. The remaining families having  $\leq$  five or less number of plants are also being used in TEMs but their ratio is less indicating either their less popularity or scarce occurrence in the area. Similar reports about the presence of secondary metabolites have been cited in the previous works where plants of families like Moraceae, Lamiaceae, Asteraceae and Poaceae have been used for cure of different infirmities by local people of KPK, areas of Pakistan [90]. Many plant species reported from the study area have been used for cure of diabetics, respiratory disorders, skin allergies, stomachache and other infirmities (Tables 2 and 3). In previous research studies, similar results have been reported that many plants belonging to 46 families of lesser Himalaya regions of Pakistan are prevalently used to cure reproductive and respiratory disorders [91]. Another researcher, Kayani (2014) had conducted research work on TEMs uses of 120 plants belonging to fifty one families which had been used by indigenous people of the Abbottabad, KPK of Pakistan [92]. The plants cited here from the study area have been used by local rural communities as TEMs and these findings are in congruent with previous ethnobotanical works of many researchers [93–97]. The plants which have perennial life pattern showed more use in TEMS than annual species because their leaves, roots and fruits are prevalently available for use as ethnomedicines [98–100].

### Plant part(s) used, preparation methods and mode of administration

In the study, 150 plants have been reported to be used in TEMs and many parts of the plants are used in the preparation of ethnomedicines but leaves are more prevalently used because leaf is the active area of plant machinery in which photosynthesis takes place and produces all phytoconstituents. Almost all parts of the plants are used in different TEMs, but leaves have the highest (36.49%) in usage value, followed by fruit (12.07%), whole plants (10.63%) and gum with least (4.60%) as shown in Fig 4. The similar findings have been reported in previous works conducted in Italy and Islands which reported that the leaves were commonly used in herbal medicines [101, 102].

It has been found that excessive collection of leaf along with other parts like roots and bark from plants have caused severe threats for many medicinal plants in the study area. It is also found plants' leaves have more efficacy than other parts because leaf has more quantity of chemical constituents; furthermore potential of herbal medicine depends on use-mode, method of preparation and utilization technique [103]. There is need to start awareness campaigns to train local people about mechanism of plants' parts collection so that medicinal plants may not be severely damaged and thrived towards endangered and extinction zones.

**Table 1. Family index depicting distribution of medicinal plants in Samahni Area of AJK.**

| Name of Family  | No of Species | %age contribution | Name of Family   | No of Species | %age contribution |
|-----------------|---------------|-------------------|------------------|---------------|-------------------|
| Acanthaceae     | 01            | 0.70              | Lamiaceae        | 07            | 4.90              |
| Anacardiaceae   | 01            | 0.70              | Loranthaceae     | 02            | 1.40              |
| Asclepiadaceae  | 02            | 1.40              | Malvaceae        | 05            | 3.50              |
| Amaranthaceae   | 05            | 3.50              | Meliaceae        | 03            | 2.10              |
| Alliaceae       | 01            | 0.70              | Mimosaceae       | 03            | 2.10              |
| Apocynaceae     | 03            | 2.10              | Moraceae         | 11            | 7.69              |
| Asphodelaceae   | 01            | 0.70              | Moringaceae      | 01            | 0.70              |
| Asteraceae      | 09            | 6.29              | Myrtaceae        | 01            | 0.70              |
| Arecaceae       | 01            | 0.70              | Nyctaginaceae    | 01            | 0.70              |
| Berberidaceae   | 01            | 0.70              | Oleaceae         | 01            | 0.70              |
| Bombacaceae     | 01            | 0.70              | Oxalidaceae      | 01            | 0.70              |
| Boraginaceae    | 03            | 2.10              | Pinaceae         | 01            | 0.70              |
| Brassicaceae    | 02            | 1.40              | Plantaginaceae   | 01            | 0.70              |
| Caesalpiniaceae | 02            | 1.40              | Papaveraceae     | 02            | 1.40              |
| Caryophyllaceae | 02            | 1.40              | Papilionaceae    | 07            | 4.90              |
| Capparaceae     | 02            | 1.40              | Phyllanthaceae   | 01            | 0.70              |
| Chenopodiaceae  | 01            | 0.70              | Poaceae          | 08            | 5.59              |
| Celastraceae    | 01            | 0.70              | Polygonaceae     | 02            | 1.40              |
| Colchicaceae    | 01            | 0.70              | Portulacaceae    | 01            | 0.70              |
| Combretaceae    | 01            | 0.70              | Ranunculaceae    | 04            | 2.80              |
| Commelinaceae   | 01            | 0.70              | Rosaceae         | 01            | 0.70              |
| Convolvulaceae  | 05            | 3.50              | Rutaceae         | 01            | 0.70              |
| Cuscutaceae     | 01            | 0.70              | Salicaceae       | 02            | 1.40              |
| Cucurbitaceae   | 01            | 0.70              | Scrophulariaceae | 02            | 1.40              |
| Cyperaceae      | 02            | 1.40              | Solanaceae       | 07            | 4.90              |
| Euphorbiaceae   | 08            | 5.59              | Tiliaceae        | 02            | 1.40              |
| Flacourtiaceae  | 01            | 0.70              | Urticaceae       | 01            | 0.70              |
| Fumariaceae     | 01            | 0.70              | Violaceae        | 01            | 0.70              |
| Juglandaceae    | 01            | 0.70              | Zygophyllaceae   | 01            | 0.70              |

<https://doi.org/10.1371/journal.pone.0243151.t001>

TEMs reported here have been prepared by using different recipes and methods such as extract, infusion, tea, decoction, powder, poultice and paste etc (Fig 5). The most common form of utilization of ethnomedicines was decoction with 29.28%, followed by tea (23.05%), extract (12.17%) and least usage form was pickle (0.66%), because pickle cannot be prepared

**Table 2. Informant consensus factor (ICF) by categories of diseases in study area of Samahni, Azad Jammu and Kashmir, Pakistan.**

| S No | Category/ Plants Used for Disease(s)      | Species | (%) All species | Use citations | (%) All citations | ICF (nur-nt)/ (nur-1) |
|------|-------------------------------------------|---------|-----------------|---------------|-------------------|-----------------------|
| 1    | Diabetics and blood pressure              | 20      | 08.29           | 330           | 15.50             | 0.94                  |
| 2    | Fever, flu, headache, bronchitis, cough   | 45      | 18.67           | 255           | 11.97             | 0.82                  |
| 3    | Epilepsy and mental disorders             | 34      | 14.10           | 211           | 09.91             | 0.84                  |
| 4    | Stomachic, constipation, haemorrhoids     | 28      | 11.61           | 196           | 09.20             | 0.86                  |
| 5    | Jaundice, spleen and liver disorders.     | 42      | 17.42           | 245           | 11.50             | 0.83                  |
| 6    | Cardiovascular disorders                  | 18      | 07.46           | 158           | 07.42             | 0.89                  |
| 7    | Rabies and other sting pains              | 14      | 05.80           | 190           | 08.92             | 0.93                  |
| 8    | Gut, tuberculosis, ulcers and leucorrhoea | 19      | 07.88           | 181           | 08.50             | 0.90                  |
| 9    | Arthritis and joint disorders             | 22      | 09.12           | 235           | 11.03             | 0.91                  |
| 10   | Kidney and urinary disorders              | 19      | 07.88           | 128           | 06.01             | 0.85                  |

<https://doi.org/10.1371/journal.pone.0243151.t002>

**Table 3. Relative frequency of citation (RFC) and use value index (UVI) of the most commonly used indigenous plants by the local people of different areas of Samahni, District Bhimber (AJK), Pakistan.**

| S. No | Botanical Names with Family                                                      | Local Name    | Flowering Period | Life Habit/<br>Life Form |   |   | Part(s)/Form (s) of Usage              | Application mode         | Phytotherapeutic Utilization as EMs and Phytonyms                                                                                                                  | RFC UV ΣUI UVI<br>(with 55 Informants in the Analysis) |      |    |      |
|-------|----------------------------------------------------------------------------------|---------------|------------------|--------------------------|---|---|----------------------------------------|--------------------------|--------------------------------------------------------------------------------------------------------------------------------------------------------------------|--------------------------------------------------------|------|----|------|
|       |                                                                                  |               |                  | W                        | T | P |                                        |                          |                                                                                                                                                                    |                                                        |      |    |      |
| 1.    | <i>Acacia modesta</i> Wall. Leguminosae; subfamily Mimosaceae MUH-1366           | Phulaai       | Mar. to May      | W                        | T | P | Bark, Gum, leaf/ decoction, tea        | Oral, gargle and topical | Toothache, cough dysentery, bacterial infections, stimulant, backache, venereal infirmities and leprosy.                                                           | 52                                                     | 0.95 | 48 | 0.87 |
| 2.    | <i>Acacia nilotica</i> (L.) Delile M. Leguminosae; subfamily Mimosaceae MUH-1368 | Kikar         | Mar. to Aug.     | W                        | T | P | Bark, Gum/ Decoction, powder           | Oral, gargle and topical | Wound healing, fever, cough, cold, toothache, feet infection, sexual disorders, diabetics, body weakness and used as ethnoveterinary medicines (EVMs).             | 22                                                     | 0.40 | 43 | 0.78 |
| 3.    | <i>Achyranthus aspera</i> L. Amaranthaceae MUH-1539                              | Phutkanda     | Feb. to Apr.     | W                        | H | A | Fruit, leaf, seed /Decoction, powder   | Oral and topical         | Urinary diseases, asthma, stomachache, fever, cough, constipation, diuretic, wound healing, bacterial infections and prolapse problems of cattle as EVMs.          | 22                                                     | 0.40 | 38 | 0.69 |
| 4.    | <i>Aerva sanguinolenta</i> (L.) Blume Amaranthaceae MUH-1544                     | Chiti boti    | Mar. to Sep.     | W                        | H | A | Leaf, root, stem, flower/ extract, tea | Oral, and topical        | Diabetics, skin infection, bacterial and fungal disease wound, bleeding bruises healer, chest infections, edema, inflammation, snake bite, dermatitis and allergy. | 12                                                     | 0.22 | 41 | 0.75 |
| 5.    | <i>Ajuga bracteosa</i> Wall ex Benth. Lamiaceae MUH-1529                         | Haree booti   | Mar. to Dec.     | W                        | H | A | Leaf, bark / Powder, juice             | Oral, and topical        | Hypertension, jaundice, sore throat and ulcer.                                                                                                                     | 34                                                     | 0.62 | 44 | 0.80 |
| 6.    | <i>Albizia lebbeck</i> (L.) Benth. Leguminosae; subfamily Mimosaceae MUH-1370    | Cheeta Shreen | May to Jun.      | W                        | T | P | Bark, Seed/ Powder, decoction          | Oral, and topical        | Kidney disorders, wormicide and skin allergy.                                                                                                                      | 28                                                     | 0.51 | 33 | 0.60 |
| 7.    | <i>Allium jacquemontii</i> Kunth Alliaceae MUH-1608                              | Jangli Piaz   | Mar. to May      | W                        | H | A | Leaf, bulb/Juice, extract              | Oral, and topical        | Snake bite, sting of scorpion and other poisonous insects and used as EVMs.                                                                                        | 24                                                     | 0.44 | 46 | 0.84 |
| 8.    | <i>Aloe vera</i> (L.) Burm. f. Asphodelaceae MUH-1612                            | Kawal Gandal  | Jan. to Apr.     | W                        | H | A | Leaf, bulb/Juice, tea, decoction       | Oral and topical         | Piles, anal irritation, diabetics, baldness, wound healing, skin diseases, cancer, cardiovascular diseases and used as EVMs.                                       | 34                                                     | 0.62 | 52 | 0.95 |
| 9.    | <i>Alternanthera pungens</i> L. Amaranthaceae MUH-1541                           | Taahee booti  | Apr. to Nov.     | W                        | H | A | Whole plant/ powder, juice             | Oral and topical         | Diuretic issues, cancer, eye related diseases, anemia and wound healing.                                                                                           | 24                                                     | 0.44 | 46 | 0.84 |
| 10.   | <i>Amaranthus viridis</i> L. Amaranthaceae MUH-1537                              | Chulair       | All the year     | W                        | H | A | Leaf, root/Juice, decoction            | Oral, and topical        | Stomachache, constipation and edema.                                                                                                                               | 23                                                     | 0.42 | 47 | 0.85 |
| 11.   | <i>Artemisia scoparia</i> Waldst. & Kit. Asteraceae MUH-1429                     | Kaalee booti  | Jun. to Dec.     | W                        | H | A | Leaf, root/Juice, infusion             | Oral, and topical        | Constipation, depurative and toothache.                                                                                                                            | 35                                                     | 0.64 | 43 | 0.78 |
| 12.   | <i>Artemisia vulgaris</i> L. Asteraceae MUH-1430                                 | Kaali buti    | Jun. to Dec.     | W                        | H | A | Leaf, bark/Juice, tea                  | Oral and topical         | Malarial diseases, asthma, diarrhea, nervous, febrifuge and tonic.                                                                                                 | 32                                                     | 0.58 | 43 | 0.78 |
| 13.   | <i>Azadirachta indica</i> A. Juss. Meliaceae MUH-1321                            | Neem          | Mar. to May      | W                        | T | P | Seed, leaf, bark/ juice, decoction     | Oral and topical         | Diabetics, intestinal worms, blood purification, microbial diseases, wounds and used as EVMs.                                                                      | 37                                                     | 0.67 | 57 | 1.04 |

(Continued)

Table 3. (Continued)

| S. No | Botanical Names with Family                                                                     | Local Name  | Flowering Period | Life Habit/ Life Form |   |   | Part(s)/Form (s) of Usage                      | Application mode     | Phytotherapeutic Utilization as EMs and Phytonyms                                                                                   | RFC                                  | UV   | ΣUI | UVI  |
|-------|-------------------------------------------------------------------------------------------------|-------------|------------------|-----------------------|---|---|------------------------------------------------|----------------------|-------------------------------------------------------------------------------------------------------------------------------------|--------------------------------------|------|-----|------|
|       |                                                                                                 |             |                  |                       |   |   |                                                |                      |                                                                                                                                     | (with 55 Informants in the Analysis) |      |     |      |
| 14.   | <i>Bauhinia variegata</i> L.<br>Leguminosae; subfamily<br>Caesalpinaceae MUH-<br>1363           | Kalyar      | Feb. to<br>Apr.  | W                     | T | P | Flower, buds,<br>leaf/Powder, tea,<br>infusion | Oral and<br>topical  | Stomach diseases, bacterial<br>infections, dysentery,<br>hemorrhoids, piles, laxative,<br>wound healing, tumor and<br>snake poison. | 31                                   | 0.56 | 43  | 0.78 |
| 15.   | <i>Berberis lycium</i> Royle.<br>Berberidaceae MUH-<br>1289                                     | Sumbalo     | Apr. to<br>Jun.  | W                     | S | P | Leaf, bark/Juice,<br>tea                       | Oral and<br>topical  | Dysentery, hypertension,<br>liver disorders, wound<br>healing, Jaundice, dyspepsia,<br>sore throat and itching.                     | 52                                   | 0.95 | 52  | 0.95 |
| 16.   | <i>Boerhavia procumbens</i><br>Banks ex Roxb.<br>Nyctaginaceae MUH-<br>1535                     | Sanaati     | All the year     | W                     | H | A | Leaf, root, whole<br>plant/ tea,<br>decoction  | Oral and<br>topical  | Dysentery, stomachache and<br>aphrodisiac.                                                                                          | 48                                   | 0.87 | 54  | 0.98 |
| 17.   | <i>Bombax ceiba</i> L.<br>Bombacaceae MUH-1302                                                  | Simbal      | Feb. to<br>Apr.  | W                     | T | P | Leaves, flower/<br>infusion, powder            | Oral and<br>topical  | Cough, fever, menstrual pain,<br>flu, sore throat and tumors.                                                                       | 36                                   | 0.65 | 40  | 0.73 |
| 18.   | <i>Bromus japonicus</i> L.<br>Poaceae MUH-1658                                                  | Lomar gasss | Jul. to Aug.     | W                     | H | A | Leaf, whole<br>plant/Extract                   | Oral and<br>topical  | Chest pains and edema or<br>inflammation issues.                                                                                    | 21                                   | 0.38 | 22  | 0.40 |
| 19.   | <i>Butea monosperma</i><br>(Lam.) Taub.<br>Leguminosae; subfamily<br>Papilionaceae MUH-<br>1337 | Cheechra    | Mar. to<br>May   | W                     | T | P | Stem, Fruit/<br>powder, tea,<br>infusion       | Oral and<br>topical  | Eye diseases, diabetes and<br>kidney disorders.                                                                                     | 23                                   | 0.42 | 40  | 0.73 |
| 20.   | <i>Calotropis procera</i><br>(Aiton) Dryand.<br>Asclepiadaceae MUH-<br>1448                     | Aak         | All the year     | W                     | S | P | Flower, latex,<br>leaf/Paste,<br>extract       | Oral and<br>topical  | Asthma, cough, fever, wound<br>healing, snake bite, skin<br>diseases, fungus diseases,<br>scabies and used as EVMs.                 | 41                                   | 0.75 | 41  | 0.75 |
| 21.   | <i>Capparis decidua</i><br>(Forssk.) Edgew.<br>Capparaceae MUH-1583                             | Kareer      | Mar. to<br>Apr.  | W                     | S | P | Leaf, stem, root,<br>bark/Decoction,<br>tea    | Oraland<br>topical   | Bacterial diseases, cough and<br>flu.                                                                                               | 34                                   | 0.62 | 46  | 0.84 |
| 22.   | <i>Capparis sepiaria</i> L.<br>Capparaceae MUH-1584                                             | Kareere     | Mar. to<br>Apr.  | W                     | S | P | Leaf, stem, root,<br>bark/ Decoction,<br>tea   | Oral and<br>topical  | Bacteria and fungi infections,<br>foot or skin allergy.                                                                             | 35                                   | 0.64 | 42  | 0.76 |
| 23.   | <i>Carissa opaca</i> Stapf ex<br>Haines. Apocynaceae<br>MUH-1444                                | Ganranda    | Apr. to<br>Jun.  | W                     | S | P | Latex, fruit, leaf/<br>Juice, infusion,<br>tea | Oral and<br>topical  | Snake and scorpion bite,<br>stomachache, jaundice and<br>hepatitis.                                                                 | 44                                   | 0.80 | 51  | 0.93 |
| 24.   | <i>Cuscuta reflexa</i> Roxb.<br>Cuscutaceae MUH-1482                                            | Kaash bail  | Aug. to<br>Sep.  | W                     | H | A | Stem/ juice,<br>infusion                       | Oral and<br>topical  | Lice killer, skin diseases,<br>anemia and weakness in<br>children.                                                                  | 33                                   | 0.60 | 45  | 0.82 |
| 25.   | <i>Casearia tomentosa</i><br>Roxb. Salicaceae MUH-<br>1290                                      | Chillah     | Mar. to<br>Jun.  | W                     | T | P | Fruit, leaf/<br>extract, infusion              | Oral, and<br>topical | Fish killer/ catching used as<br>bio-net, diabetic and urinary<br>disorders.                                                        | 16                                   | 0.29 | 32  | 0.58 |
| 26.   | <i>Cassia fistula</i> L.<br>Leguminosae; subfamily<br>Caesalpinaceae MUH-<br>1364               | Krinjal     | Apr. to<br>May   | W                     | T | P | Leaf, seeds,<br>pods/ tea,<br>powder, infusion | Oral and<br>topical  | Stomach problem, asthma,<br>febrifuge and as source<br>ethnoveterinary medicines<br>(EVMs).                                         | 32                                   | 0.58 | 34  | 0.62 |
| 27.   | <i>Cenchrus biflorus</i> Roxb.<br>Poaceae MUH-1637                                              | Bhurat Gass | Jan. to Apr.     | W                     | H | A | Leaf, whole<br>plant/ extract,<br>tea          | Oral and<br>topical  | Seeds edible, bacterial<br>diseases, chest infection and<br>cough.                                                                  | 32                                   | 0.58 | 35  | 0.64 |
| 28.   | <i>Ceropegia bulbosa</i> L.<br>Asclepiadaceae MUH-<br>1453                                      | Galot       | Jul. to Sep.     | W                     | H | A | Leaf, tuber/<br>Paste, juice, tea              | Oral and<br>topical  | Spleen and kidney disorders,<br>cancer, gasteroprotective,<br>microbial infections and<br>inflammatory issues.                      | 34                                   | 0.62 | 42  | 0.76 |
| 29.   | <i>Chenopodium album</i> L.<br>Chenopodiaceae MUH-<br>1545                                      | Bathoo      | Jan. to Sep.     | W                     | H | A | Leaf, root/Juice,<br>paste, infusion           | Oral and<br>topical  | Constipation, laxative and<br>stomach pains.                                                                                        | 32                                   | 0.58 | 46  | 0.84 |

(Continued)

Table 3. (Continued)

| S. No | Botanical Names with Family                                         | Local Name      | Flowering Period | Life Habit/ Life Form                |   |   | Part(s)/Form (s) of Usage            | Application mode         | Phytotherapeutic Utilization as EMs and Phytonyms                                                                                                                                               | RFC | UV   | ΣUI | UVI  |
|-------|---------------------------------------------------------------------|-----------------|------------------|--------------------------------------|---|---|--------------------------------------|--------------------------|-------------------------------------------------------------------------------------------------------------------------------------------------------------------------------------------------|-----|------|-----|------|
|       |                                                                     |                 |                  | (with 55 Informants in the Analysis) |   |   |                                      |                          |                                                                                                                                                                                                 |     |      |     |      |
| 30.   | <i>Chenopodium ambrosioides</i> L. MUH-1436                         | Gandee buti     | May to Oct.      | W                                    | H | A | Leaf, root/ Juice, paste, infusion   | Oral, and topical        | Wound healing, stomach wormicidal, constipation and piles.                                                                                                                                      | 27  | 0.49 | 42  | 0.76 |
| 31.   | <i>Cichorium intybus</i> L. Asteraceae MUH-1402                     | Kasni           | Jun. to Sep.     | W                                    | H | A | Leaf, seeds/ powder, extract         | Oral, gargle and topical | Fever, indigestion, omititng. blood purifier, kideny problems, urinary problems, hapatitis and tooth pains.                                                                                     | 32  | 0.58 | 32  | 0.58 |
| 32.   | <i>Cirsium arvensis</i> (L.) Scop. Asteraceae MUH-1435              | Kandyaree       | Mar. to May      | W                                    | H | A | Leaf, root, flower/extract, powder   | Oral and topical         | Bacterial and fungal diseases or infections, cough and flu.                                                                                                                                     | 30  | 0.55 | 42  | 0.76 |
| 33.   | <i>Citrullus colocynthis</i> (L.) Shard Cucurbitaceae MUH-1388      | Tuma            | Jan. to Apr.     | W                                    | H | A | Lea, fruit, seed/ powder, decoction  | Oral and topical         | Emmenagogue, purgative, cathartic, amenorrhoea, syphilis, tumors, diabetics, jaundice, rheumatism, urinary problems and snake bite. The plant is also used as ethnoveterinary medicines (EVMs). | 36  | 0.65 | 41  | 0.75 |
| 34.   | <i>Clematis grata</i> Wall. Ranunculaceae MUH-1261                  | Bohree bail     | Apr. to Aug.     | W                                    | L | A | Leaf, stem, bark/ paste, infusion    | Oral and topical         | Body weakness & slimness in childeen and wormicide in goats and animals.                                                                                                                        | 25  | 0.45 | 18  | 0.33 |
| 35.   | <i>Clematis graveolens</i> Lindl. Ranunculaceae MUH-1262            | Bailereee       | Apr. to May      | W                                    | L | A | Leaf, root/ extract, decoction       | Oral and topical         | Wormicidal in animals, and to cure tumors or boils.                                                                                                                                             | 25  | 0.45 | 45  | 0.82 |
| 36.   | <i>Clematis connata</i> DC. Ranunculaceae MUH-1263                  | Clemoo, bailary | Jul. to Aug.     | W                                    | L | A | Leaf and bark/ tea, decoction        | Oral and topical         | To elelminate stomach worms in animals, cure boils and tumors.                                                                                                                                  | 21  | 0.38 | 35  | 0.64 |
| 37.   | <i>Colebrookea oppositifolia</i> Smith. Lamiaceae MUH-1519          | Bindaa          | Jan. to Apr.     | W                                    | H | A | Leaf, bark, root/ powder, extract    | Oral and topical         | Fever, flu, wounds, bruises cure and epilepsy.                                                                                                                                                  | 36  | 0.65 | 35  | 0.64 |
| 38.   | <i>Commelina benghalensis</i> L. Commelinaceae MUH-1617             | Surkara         | Aug. to Nov.     | W                                    | H | A | Leaf, whole plant/Juice, extract     | Oral and topical         | Constipation, diuretic, febrifuge, treat burns and inflammatory issues.                                                                                                                         | 24  | 0.44 | 42  | 0.76 |
| 39.   | <i>Convolvulus arvensis</i> L. Convolvulaceae MUH-1470              | Harn kuree      | Feb. to Aug.     | W                                    | H | A | Leaf, whole plant/Extract, juice     | Oral and topical         | Diuretic and purgative, fever, loss of memory and fatigue.                                                                                                                                      | 14  | 0.25 | 24  | 0.44 |
| 40.   | <i>Convolvulus prostratus</i> Forssk. Convolvulaceae MUH-1471       | Lailee          | Feb. to Aug.     | W                                    | H | A | Leaf, whole plant/Juice, infusion    | Oral and topical         | Fever, nervous debility, and loss of memory, purgative and body fatigue/muscle pains.                                                                                                           | 16  | 0.29 | 32  | 0.58 |
| 41.   | <i>Corchorus olitorius</i> L. Tiliaceae MUH-1309                    | Jangli Patsan   | May to Jul.      | W                                    | H | A | Leaf, WP/ powder, juice              | Oral and topical         | Ascites, dysuria pain, cystitis, fever piles and tumors.                                                                                                                                        | 22  | 0.40 | 28  | 0.51 |
| 42.   | <i>Cordia gharaf</i> (Forssk.) Ehren. ex Asch Boraginaceae MUH-1462 | Gondee          | Apr. to Jun.     | W                                    | T | P | Leaf, root, Stem/ juice, tea, powder | Oral and topical         | Fever, cough, chest infection, diuretic, demulcent and stomachache.                                                                                                                             | 32  | 0.58 | 44  | 0.80 |
| 43.   | <i>Cordia obliqua</i> L. Boraginaceae MUH-1461                      | Lasoora         | Mar. to Apr.     | W                                    | T | P | Whole plant/ pickle, juice, tea      | Oral and topical         | Diuretic, fever, joints pain, dry cough, throats pain, tonic and stomach ulcer.                                                                                                                 | 35  | 0.64 | 51  | 0.93 |
| 44.   | <i>Cymbopogan citratus</i> (John) Schutt Poaceae MUH-1468           | Lemon gass      | Oct-Dec.         | W                                    | H | A | Leaf, whole plant/ tea               | Oral and topical         | Flu, amoebic diseases, bacterial infection, diarrhea, fungal infirmities, inflammations and cough.                                                                                              | 13  | 0.24 | 32  | 0.58 |

(Continued)

Table 3. (Continued)

| S. No | Botanical Names with Family                                  | Local Name     | Flowering Period | Life Habit/ Life Form |   |   | Part(s)/Form (s) of Usage             | Application mode | Phytotherapeutic Utilization as EMs and Phytonyms                                                                                                 | RFC                                  | UV   | ΣUI | UVI  |
|-------|--------------------------------------------------------------|----------------|------------------|-----------------------|---|---|---------------------------------------|------------------|---------------------------------------------------------------------------------------------------------------------------------------------------|--------------------------------------|------|-----|------|
|       |                                                              |                |                  |                       |   |   |                                       |                  |                                                                                                                                                   | (with 55 Informants in the Analysis) |      |     |      |
| 45.   | <i>Cynodon dactylon</i> (L.) Pers. Poaceae MUH-1645          | Khabal gass    | All the year     | W                     | H | A | Whole plant / extract, tea            | Oral and topical | Wound healing, skin diseases, fever and respiratory disorders.                                                                                    | 22                                   | 0.40 | 54  | 0.98 |
| 46.   | <i>Cynoglossum lanceolatum</i> Forssk. Boraginaceae MUH-1469 | Lahndara       | Jun. to Sep.     | W                     | H | A | Leaf, bark / extract, tea, infusion   | Oral and topical | Flu, cough, heart issues, asthma and fever.                                                                                                       | 32                                   | 0.58 | 44  | 0.80 |
| 47.   | <i>Datura innoxia</i> Mill. Solanaceae MUH-1489              | Datoora        | May to Oct.      | W                     | S | P | Fruit, leaf/ powder, decoction        | Oral and topical | Insecticidal, baldness, wound healing, antiseptic, sedative, narcotic, asthma and mosquito repellent.                                             | 34                                   | 0.62 | 51  | 0.93 |
| 48.   | <i>Datura stramonium</i> L. Solanaceae MUH-1490              | Tatoora        | May to Jul.      | W                     | S | P | Leaf, fruit, root/ powder, decoction  | Oral and topical | Insecticide, antipyretic, narcotic, vermifugal, cold and fever in cattle as EVM. It is used for early copulation and pregnancy in cow/ buffaloes. | 36                                   | 0.65 | 50  | 0.91 |
| 49.   | <i>Digera muricata</i> (L.) Mart. Amaranthaceae MUH-1536     | Toondola       | July-Dec         | W                     | H | A | Leaf, whole plant/ tea, infusion      | Oral and topical | Digestive disorders and urinary problems.                                                                                                         | 22                                   | 0.40 | 23  | 0.42 |
| 50.   | <i>Echinochloa colona</i> (L.) Link Poaceae MUH-1656         | Mordhaani      | Mar to Jul.      | W                     | H | A | Leaf, root/ juice, paste              | Oral and topical | Dropsy treatment, skin rashes, spleen enlargement, hemorrhage and irritations.                                                                    | 15                                   | 0.27 | 17  | 0.31 |
| 51.   | <i>Echinochloa crus-galli</i> L. Poaceae MUH-1658            | Cockspur grass | Mar to Jul.      | W                     | H | A | Leaf, whole plant/paste, extract      | Oral and topical | Spleen disorders, fever, skin allergies and cough.                                                                                                | 34                                   | 0.62 | 45  | 0.82 |
| 52.   | <i>Echinops echinatus</i> Roxb. Asteraceae MUH-1428          | Utaa kateera   | Mar. to May      | W                     | H | A | Whole plant /tea, paste, extract      | Oral and topical | Stomach problems, nerve tonic and aphrodisiac agent.                                                                                              | 31                                   | 0.56 | 34  | 0.62 |
| 53.   | <i>Eclipta prostrata</i> (L.) L. Asteraceae MUH-1405         | Phol buti      | May to Jul.      | W                     | H | A | Leaf, whole plant/ juice, infusion    | Oral and topical | Bacterial and fungal diseases, skin rashes, hair fall and oxidative stress.                                                                       | 23                                   | 0.42 | 35  | 0.64 |
| 54.   | <i>Eruca sativa</i> L. Brassicaceae MUH-1274                 | Jaamaan        | April to June    | W                     | H | A | Leaf, seeds/ juice, infusion          | Oral and topical | Body fatigue, rashes, lice killer, mosquito repellent, laxative and used as fodder for cattle and EVMs.                                           | 37                                   | 0.67 | 54  | 0.98 |
| 55.   | <i>Euphorbia helioscopia</i> L. Euphorbiaceae MUH-1559       | Dodal          | Jan. to Apr.     | W                     | H | A | Leaf, whole plant, seed/ extract      | Oral and topical | Wormicidal, skin rashes and purgative purpose.                                                                                                    | 23                                   | 0.42 | 44  | 0.80 |
| 56.   | <i>Euphorbia heterophylla</i> L. Euphorbiaceae MUH-1560      | Dodal          | Jan. to Oct.     | W                     | H | A | Whole plant/ decoction                | Oral and topical | Microbial disease/ infections, skin diseases and respiratory diseases.                                                                            | 18                                   | 0.33 | 42  | 0.76 |
| 57.   | <i>Euphorbia hirta</i> L. Euphorbiaceae MUH-1561             | Lailee Dodal   | Jun. to Dec.     | W                     | H | A | Seeds, leaf/ extract                  | Topical and oral | Diarrhea, bacterial infections, diabetics, inflammatory problems.                                                                                 | 13                                   | 0.24 | 33  | 0.60 |
| 58.   | <i>Euphorbia indica</i> Lam. Euphorbiaceae MUH-1563          | Dodalee        | Jun. to Sep.     | W                     | H | A | Whole plant/ decoction                | Topical and oral | Snake bite, scorpion bite and immune disorders.                                                                                                   | 24                                   | 0.44 | 41  | 0.75 |
| 59.   | <i>Euphorbia prolifera</i> Buch.-Ham. Euphorbiaceae MUH-1562 | Dodal          | Jun. to Sep.     | W                     | H | A | Whole plant/ extract                  | Topical and oral | Skin diseases, anemia, kidney diseases and microbial infections.                                                                                  | 35                                   | 0.64 | 42  | 0.76 |
| 60.   | <i>Euphorbia prostrata</i> Ait. Euphorbiaceae MUH-1564       | Hazaar dani    | Jun. to Aug.     | W                     | H | A | Leaf, whole plant/infusion, decoction | Oral and topical | Diuretic, cough, chest infections and vomiting.                                                                                                   | 33                                   | 0.60 | 32  | 0.58 |

(Continued)



Table 3. (Continued)

| S. No | Botanical Names with Family                                             | Local Name    | Flowering Period | Life Habit/ Life Form                |   |   | Part(s)/Form (s) of Usage                        | Application mode         | Phytotherapeutic Utilization as EMs and Phytonyms                                                                                 | RFC | UV   | ΣUI | UVI  |
|-------|-------------------------------------------------------------------------|---------------|------------------|--------------------------------------|---|---|--------------------------------------------------|--------------------------|-----------------------------------------------------------------------------------------------------------------------------------|-----|------|-----|------|
|       |                                                                         |               |                  | (with 55 Informants in the Analysis) |   |   |                                                  |                          |                                                                                                                                   |     |      |     |      |
| 61.   | <i>Ficus auriculata</i> Lour.<br>Moraceae MUH-1598                      | Pakwaree      | Aug. to Nov.     | W                                    | T | P | Stem, fruit, leaf/ tea, decoction, powder        | Oral, topical and gargle | Toothache, constipation, chest infections, oral infection and gastrointestinal.                                                   | 44  | 0.80 | 49  | 0.89 |
| 62.   | <i>Ficus benghalensis</i> L.<br>Moraceae MUH-1595                       | Bohr          | May to Jun.      | W                                    | T | P | Stem, leaf, fruit, latex/ decoction, tea         | Oral, topical and gargle | Spermatogenesis, skin diseases, diabetes and toothache.                                                                           | 41  | 0.75 | 47  | 0.85 |
| 63.   | <i>Ficus palmata</i> Forssk.<br>Moraceae MUH-1597                       | Pakwar        | May to Oct.      | W                                    | T | P | Leaf, fruit, wood/ decoction, tea                | Oral, topical and gargle | Stomach disorders i.e. ulcers, and sexual disorders, diabetes, tonic, laxative and toothache.                                     | 31  | 0.56 | 43  | 0.78 |
| 64.   | <i>Ficus religiosa</i> L.<br>Moraceae MUH-1596                          | Peepal        | Mar. to Apr.     | W                                    | T | P | Seed, fruit, root/ powder, tea                   | Oral, topical and gargle | Asthma, dysentery, diabetes, wounds healing, epilepsy, diarrhea, fever, gastritis, inflammation, infectious and sexual disorders. | 33  | 0.60 | 41  | 0.75 |
| 65.   | <i>Ficus semicordata</i> Buch.-Ham. ex Smith<br>Moraceae MUH-1599       | Pakwaree      | Mar. to May      | W                                    | T | P | Fruit, bark, wood/ tea, decoction                | Oral, topical and gargle | Toothache, gums bleeding, Asthma, digestive problems, skin diseases, inflammation and diabetes.                                   | 37  | 0.67 | 51  | 0.93 |
| 66.   | <i>Ficus variegata</i> Blume<br>Moraceae MUH-1596                       | Kancheer      | May to Jun.      | W                                    | T | P | Leaf, fruit, bark / decoction                    | Oral, topical and gargle | Skin diseases, diabetes, tonic, respiratory and chest disorders, fungal allergy and toothache.                                    | 36  | 0.65 | 48  | 0.87 |
| 67.   | <i>Ficus racemosa</i> L.<br>Moraceae MUH-1593                           | Tomentosa     | May to Jul.      | W                                    | T | P | Leaf, bark, fruit/ tea, infusion                 | Oral, topical and gargle | Stomachache, diarrhea, respiratory infections, piles, diabetes, liver disorder and urinary diseases.                              | 35  | 0.64 | 46  | 0.84 |
| 68.   | <i>Flacourtia indica</i> (Burm. f.) Merrill.<br>Flacourtiaceae MUH-1290 | Kako          | Mar. to Apr.     | W                                    | T | P | Fruit, leaf /powder, tea, infusion               | Oral and topical         | Liver disorders, malaria cure, snakebite and arthritis.                                                                           | 25  | 0.45 | 35  | 0.64 |
| 69.   | <i>Fumaria indica</i> (Hauuskn.) Pugs.<br>Fumariaceae MUH-1270          | Papra         | Feb. to Jun.     | W                                    | H | A | Leaf and stem/ decoction                         | ORAL AND TOPICAL         | BLOOD PURIFIER, DIAPHORETIC AND ANTIPYRETIC.                                                                                      | 23  | 0.42 | 43  | 0.78 |
| 70.   | <i>Gloriosa superba</i> L.<br>Colchicaceae MUH-1614                     | Kalihari      | Nov. to Apr.     | W                                    | H | A | Root, leaf/ tea, paste                           | Oral and Topical         | Colic pains, stomachache, constipation, tumors and haemorrhoids.                                                                  | 23  | 0.42 | 42  | 0.76 |
| 71.   | <i>Grewia optiva</i> J.R. Drumm. ex Burret.<br>Tiliaceae MUH-1304       | Dhaman        | Apr. to Sep.     | W                                    | T | P | Stem, leaf, fruit/ tea, extract, infusion, paste | Oral and Topical         | Aphrodisiac, wound healing, prolapse of placenta and as EVMs.                                                                     | 32  | 0.58 | 48  | 0.87 |
| 72.   | <i>Ipomoea carnea</i> Jacq.<br>Convolvulaceae MUH-1474                  | Jangli baikar | Jul. to Nov.     | W                                    | S | P | Leaf, bark/ decoction, paste                     | Oral and Topical         | Cancer, rheumatic, purgative, wound healing and hypertension.                                                                     | 28  | 0.51 | 37  | 0.67 |
| 73.   | <i>Ipomoea eriocarpa</i> R.Br.<br>Convolvulaceae MUH-1476               | Bhanwar boti  | Jul. to Oct.     | W                                    | S | P | Leaf, bark, flower/ powder, tea                  | Oral, and Topical        | Cancer and other tumors issues; eczema problems and skin diseases.                                                                | 16  | 0.29 | 38  | 0.69 |
| 74.   | <i>Ipomoea cairica</i> (L.)<br>Sweet Convolvulaceae MUH-1479            | Neeli bail    | Aug. to Nov.     | W                                    | S | P | Leaf, bark/ decoction, infusion                  | Oral, and Topical        | Fever, encephalitis, viral infections and skin problems.                                                                          | 18  | 0.33 | 36  | 0.65 |
| 75.   | <i>Juglans regia</i> L.<br>Juglandaceae MUH-1600                        | Akhrot        | Feb. to Apr.     | W                                    | T | P | Fruit, leaf, bark/ infusion, decoction           | Oral and Topical         | Body tonic, constipation, teeth cleanser, chronic cough, asthma, flu, bacterial infections and dyspepsia.                         | 45  | 0.82 | 51  | 0.93 |

(Continued)

Table 3. (Continued)

| S. No | Botanical Names with Family                                                     | Local Name   | Flowering Period | Life Habit/ Life Form |    |   | Part(s)/Form (s) of Usage              | Application mode  | Phytotherapeutic Utilization as EMs and Phytonyms                                                                  | RFC                                  | UV    | ΣUI | UVI  |
|-------|---------------------------------------------------------------------------------|--------------|------------------|-----------------------|----|---|----------------------------------------|-------------------|--------------------------------------------------------------------------------------------------------------------|--------------------------------------|-------|-----|------|
|       |                                                                                 |              |                  |                       |    |   |                                        |                   |                                                                                                                    | (with 55 Informants in the Analysis) |       |     |      |
| 76.   | <i>Justicia adhatoda</i> L.<br>Acanthaceae MUH-1505                             | Baikar       | Aug. to Oct.     | W                     | S  | P | Leaf, bark, fruit / decoction, extract | Oral and Topical  | Wound healing, septic problems, abortifacient, arthritis, chest pain, wound healing, diabetes, cancer and as EVMs. | 48                                   | 42.00 | 55  | 1.00 |
| 77.   | <i>Kickxia ramosissima</i> (Wall.) Janchen<br>Scrophulariaceae MUH-1495         | Khunjer buti | Mar. to Apr.     | W                     | H  | A | Leaf, bark/ decoction, tea             | Oral, and Topical | Diabetes, wound healing, sores, skin irritations, irritation, diarrhoea and cuts cure.                             | 42                                   | 0.76  | 48  | 0.87 |
| 78.   | <i>Kyllinga brevifolia</i> Rottb.<br>Cyperaceae MUH-1669                        | Sedge        | Aug. to Sep.     | W                     | H  | A | Leaf, bark/ infusion, extract          | Oral and Topical  | Inflammations, viral infections, diabetics, flu and chest infections.                                              | 41                                   | 0.75  | 43  | 0.78 |
| 79.   | <i>Launea coromandelica</i> (Houtt.) Merr.<br>Anacardiaceae MUH-1418            | Kalmaan      | Mar. to Jul.     | W                     | T  | P | Leaf, bark, wood/ decoction. tea       | Oral, and Topical | Feet inflammations, sprains, body swellings, ulcers, elephantiasis and used as EVMs.                               | 25                                   | 0.45  | 42  | 0.76 |
| 80.   | <i>Launea procumbens</i> Roxb.<br>Asteraceae MUH-1414                           | Khara Dodal  | Mar. to Apr.     | W                     | H  | A | Leaf, whole plant/poultice, decoction  | Oral, and Topical | Wound healing, gonorrhea, cardiac pains, inflammation, cancer and broken bones.                                    | 24                                   | 0.44  | 33  | 0.60 |
| 81.   | <i>Lindenbergia macrostachya</i> (Benth.) Benth.<br>Scrophulariaceae MUH-1496   | Lindlee      | Mar. to Apr.     | W                     | H  | A | Leaf, stem, root/ decoction            | Oral and Topical  | Fever, cough, other bacterial and fungal diseases.                                                                 | 45                                   | 0.82  | 45  | 0.82 |
| 82.   | <i>Loranthus longiflorus</i> Desr.<br>Loranthaceae MUH-1551                     | Purakh       | Dec. to Mar.     | W                     | PS | P | Leaf, flower/ decoction                | Oral and Topical  | Diabetes, sexual infertility, cancer, skin diseases, boils, setting dislocated bones and extracting pus.           | 48                                   | 0.87  | 52  | 0.95 |
| 83.   | <i>Loranthus pulverulentus</i> Wall.<br>Loranthaceae MUH-1555                   | Phurak       | Dec. to Apr.     | W                     | PS | P | Leaf, flower/ powder, tea              | Oral and Topical  | Diabetes, cancer, Parkinson's disease, coronary heart disease, skin diseases and boils.                            | 46                                   | 0.84  | 50  | 0.91 |
| 84.   | <i>Mallotus philipiensis</i> (Lamk.) Muell. Arg.<br>Euphorbiaceae MUH-1567      | Kameela      | Mar. to May      | W                     | S  | P | Inflorescence, leaf/ tea, extract      | Oral and Topical  | Urinary issues, vulnerary, diuretic, skin disorders, heating, purgative, anthelmintic and rodents killer.          | 44                                   | 0.80  | 42  | 0.76 |
| 85.   | <i>Malva parviflora</i> L.<br>Malvaceae MUH-1297                                | Sonchal      | Dec. to Mar.     | W                     | H  | A | Whole plant/ poultice, decoction       | Oral and Topical  | Skin diseases, cough, inflammatory problems, ulcers, microbial diseases and cure of dandruff.                      | 32                                   | 0.58  | 45  | 0.82 |
| 86.   | <i>Malva sylvestris</i> L.<br>Malvaceae MUH-1298                                | Sonchal      | Dec. to Mar.     | W                     | H  | A | Leaf, whole plant/ decoction, tea      | Oral and Topical  | Stomachache, stomatitis, wormicide, glossitis, wounds healing, oral thrush and abscesses.                          | 33                                   | 0.60  | 41  | 0.75 |
| 87.   | <i>Malvastrum coromandelianum</i> (L.) Garcke<br>Malvaceae MUH-1299             | Damhni       | Mar. to Dec.     | W                     | H  | A | Leaf, whole plant /decoction, extract  | Oral and Topical  | Aphrodisiac, chest disorders. antinociceptive, inflammation issues, analgesic and bacterial diseases.              | 22                                   | 0.40  | 35  | 0.64 |
| 88.   | <i>Maytenus royleana</i> (Wall. ex M.A. Lawson.) Cufd.<br>Celastraceae MUH-1324 | Patakee      | Feb. to Mar.     | W                     | S  | P | Fruit, seeds, leaf/ decoction, extract | Oral and Topical  | Microbial infection, analgesic, gastric ulcers, inflammation problems and allergy.                                 | 43                                   | 0.78  | 48  | 0.87 |

(Continued)

Table 3. (Continued)

| S. No | Botanical Names with Family                                                                       | Local Name     | Flowering Period | Life Habit/ Life Form |   |   | Part(s)/Form (s) of Usage                  | Application mode | Phytotherapeutic Utilization as EMs and Phytonyms                                                                                           | (with 55 Informants in the Analysis) |      |     |      |
|-------|---------------------------------------------------------------------------------------------------|----------------|------------------|-----------------------|---|---|--------------------------------------------|------------------|---------------------------------------------------------------------------------------------------------------------------------------------|--------------------------------------|------|-----|------|
|       |                                                                                                   |                |                  | W                     | H | A |                                            |                  |                                                                                                                                             | RFC                                  | UV   | ΣUI | UVI  |
| 89.   | <i>Medicago polymorpha</i> L. Leguminosae; subfamily: Papilionaceae MUH-1347                      | Sareeri        | Mar. to May      | W                     | H | A | Leaf, whole plant /tea, decoction          | Oral and Topical | Fever in goats/ cattle, laxative, constipation, soar throat and used as EVMs.                                                               | 34                                   | 0.62 | 42  | 0.76 |
| 90.   | <i>Medicago laciniata</i> var. <i>laciniata</i> L. Leguminosae; subfamily: Papilionaceae MUH-1349 | Sareera        | Apr. to Jul.     | W                     | H | A | Leaf, whole plant / decoction, extract     | Oral and Topical | Constipation, fever, microbial infirmities and milk yield enhancer.                                                                         | 42                                   | 0.76 | 47  | 0.85 |
| 91.   | <i>Melia azedarach</i> (L.) Pers. Meliaceae MUH-1322                                              | Darek          | Mar. to Apr.     | W                     | T | P | Seed, leaf bark/ decoction, poultice, tea  | Oral and Topical | Asthma, blood purifier, diabetes, germicide, diuretic and used as EVMs.                                                                     | 45                                   | 0.82 | 51  | 0.93 |
| 92.   | <i>Melilotus alba</i> L. Leguminosae; subfamily Papilionaceae MUH-1352                            | Methee         | Mar. to Sep.     | W                     | H | A | Leaf, whole plant/ decoction, tea          | Oral and Topical | Fever, carminative, emollient, indigestion, flatulence and used as EVMs.                                                                    | 42                                   | 0.76 | 50  | 0.91 |
| 93.   | <i>Melilotus indica</i> (L.) All. Leguminosae; subfamily Papilionaceae MUH-1350                   | Ran-methee     | Mar. to Jul.     | W                     | H | A | Leaf, whole plant / decoction              | Oral and Topical | Diarrhea, emollient, fever, skin rash, tumors, wound healing, gastrointestinal and used as EVMs.                                            | 37                                   | 0.67 | 42  | 0.76 |
| 94.   | <i>Mentha arvensis</i> L. Lamiaceae MUH-1527                                                      | Safed podina   | May to Oct.      | W                     | H | A | Leaf, whole plant/ decoction, powder, tea  | Oral and Topical | Indigestion, carminative, dyspepsia, diarrhea and dysentery, stomachache, allergy and used as EVMs.                                         | 52                                   | 0.95 | 58  | 1.05 |
| 95.   | <i>Mentha royleana</i> Benth. Lamiaceae MUH-1526                                                  | Jangli podia   | May to Oct.      | W                     | H | A | Leaf, whole plant/ decoction, tea          | Oral and Topical | Diabetics, anticholesterol, diuretic, headache and used as EVMs.                                                                            | 51                                   | 0.93 | 61  | 1.11 |
| 96.   | <i>Mentha spicata</i> L. Lamiaceae MUH-1525                                                       | Podina         | Jul. to Aug.     | W                     | H | A | Leaf, stem, root/ decoction, tea           | Oral and Topical | Indigestion, dyspepsia, cholesterol, diuretic and headache, stomach problems and used as EVMs.                                              | 50                                   | 0.91 | 62  | 1.13 |
| 97.   | <i>Moringa oleifera</i> Lam. Moringaceae MUH-1581                                                 | Sohanjna       | Apr. to Jun.     | W                     | T | P | Leaf, fruit, seed, bark/ powder, decoction | Oral and Topical | Tooth pains, stomach ulcers, asthma, diabetes, fatty liver, inflammatory problems, infertility, oxidative stress and cardiovascular issues. | 49                                   | 0.89 | 76  | 1.38 |
| 98.   | <i>Morus alba</i> (L.) Roxb. Moraceae MUH-1591                                                    | Safed toot     | Apr. to Sep.     | W                     | T | P | Fruit/ juice, infusion, tea                | Oral and Topical | Sore throat, cough, fever, toothache and used as EVMs.                                                                                      | 44                                   | 0.80 | 52  | 0.95 |
| 99.   | <i>Morus macroura</i> Miq. Moraceae MUH-1588                                                      | Shahtoot       | Mar. to Aug.     | W                     | T | P | Leaf, fruit, wood/ juice, decoction        | Oral and Topical | Sore throat, inflammatory disorders, urinary problems, cough, fever and used as EVMs.                                                       | 43                                   | 0.78 | 58  | 1.05 |
| 100.  | <i>Morus serrata</i> Roxb. Moraceae MUH-1589                                                      | Kancheer toot  | Mar. to May      | W                     | T | P | Leaf, fruit, wood/juice, decoction         | Oral and Topical | Flu, fever and sore throat problems, disorders and urinary problems.                                                                        | 46                                   | 0.84 | 52  | 0.95 |
| 101.  | <i>Morus nigra</i> L. Moraceae MUH-1590                                                           | Kala toot      | Mar. to Jul.     | W                     | T | P | Fruit, leaf, wood/ juiced, decoction       | Oral and Topical | Anemia, cough, flu, sore throat, disorders, urinary problems and used as EVM.                                                               | 41                                   | 0.75 | 51  | 0.93 |
| 102.  | <i>Nerium oleander</i> L. Apocynaceae MUH-1446                                                    | Gandeera       | Apr. to Sep.     | W                     | S | P | Leaves, latex, bark/ decoction, extract    | Oral and Topical | Stomach pain, skin diseases, toothache, ear and eye problems and repellent of insects.                                                      | 34                                   | 0.62 | 41  | 0.75 |
| 103.  | <i>Nicotiana plumbaginifolia</i> Viv. Solanaceae MUH-1491                                         | Jangli Tomakoo | May to Jul.      | W                     | H | A | Leaf, seed, flower/ decoction, tea         | Oral and Topical | Haemorrhoids, wound healing, snake and scorpions stings' pains.                                                                             | 24                                   | 0.44 | 42  | 0.76 |

(Continued)

Table 3. (Continued)

| S. No | Botanical Names with Family                                                   | Local Name           | Flowering Period | Life Habit/ Life Form                |   |   | Part(s)/Form (s) of Usage                    | Application mode | Phytotherapeutic Utilization as EMs and Phytonyms                                                                                                          | RFC | UV   | ΣUI | UVI  |
|-------|-------------------------------------------------------------------------------|----------------------|------------------|--------------------------------------|---|---|----------------------------------------------|------------------|------------------------------------------------------------------------------------------------------------------------------------------------------------|-----|------|-----|------|
|       |                                                                               |                      |                  | (with 55 Informants in the Analysis) |   |   |                                              |                  |                                                                                                                                                            |     |      |     |      |
| 104.  | <i>Olea ferruginea</i> Wall. ex Aitch. Oleaceae MUH-1443                      | Kahoo                | Apr. to May      | W                                    | T | P | Leaf, wood, bark/decoction                   | Oral and Topical | Flu, cough, jaundice and liver problems, gonorrhoea, blood purifier. The branches are used as miswak (tooth brush) to cure bleeding gums and used as EVMs. | 28  | 0.51 | 43  | 0.78 |
| 105.  | <i>Otostegia limbata</i> (Bth.) Bion. Lamiaceae MUH-1518                      | Chitee buti          | Apr. to Aug.     | W                                    | S | P | Leaf, bark/ decoction, tea                   | Oral and Topical | Eye diseases and infections, ulcers, depressant, inflammation infirmities and bacterial diseases.                                                          | 36  | 0.65 | 40  | 0.73 |
| 106.  | <i>Oxalis corniculata</i> L. Oxalidaceae MUH-1318                             | Kati meti            | Mar. to Dec.     | W                                    | H | A | Leaf, whole plant/ decoction, tea            | Oral and Topical | Snake bites, diarrhea, stomach problems, urinary infections, enteritis, injuries, sprains and muscular swellings.                                          | 43  | 0.78 | 46  | 0.84 |
| 107.  | <i>Papaver hybridum</i> L. Papaveraceae MUH-1267                              | Kashkash             | Mar. to Jun.     | W                                    | H | A | Seeds/ powder, decoction                     | Oral and Topical | Weak eyes sight, pain killers and narcotic effects used as tonic for body vigour.                                                                          | 44  | 0.80 | 48  | 0.87 |
| 108.  | <i>Papaver somnifera</i> L. Papaveraceae MUH-1268                             | Poost                | Mar. to Jun.     | W                                    | H | A | Seeds, latex/ decoction, tea                 | Oral and Topical | Vigor tonic and sedative, dysentery, cough, brain memory enhancer and expectorant.                                                                         | 43  | 0.78 | 49  | 0.89 |
| 109.  | <i>Persicaria barbata</i> var. <i>barbata</i> (L.) Hara Polygonaceae MUH-1549 | Jor booti, Biskatali | Apr. to Sep.     | W                                    | H | A | Leaf, root, seed/ decoction                  | Oral and Topical | Bacterial infections, oxidative, oestrogenicity, fertility issues, colic pain, inflammations, urinary disorders, stomachache, and scabies.                 | 45  | 0.82 | 42  | 0.76 |
| 110.  | <i>Phalaris minor</i> L. Poaceae MUH-1652                                     | Phumna gass          | Aug. to Oct.     | W                                    | H | A | Leaf, whole plant/decoction                  | Oral and Topical | Admixture with cake of <i>Brassica campestris</i> and used as EVMs to cure of infirmities.                                                                 | 22  | 0.40 | 33  | 0.60 |
| 111.  | <i>Phoenix sylvestris</i> (L.) Roxb. Arecaceae MUH-1621                       | Kajoor               | Apr. to Sep.     | W                                    | T | P | Seed, fruit, leaf, root/ poultice, decoction | Oral and Topical | Flu, vomiting, urinary issues, bleeding nose, vertigo, sweetener and relief of unconsciousness.                                                            | 34  | 0.62 | 41  | 0.75 |
| 112.  | <i>Phyllanthus emblica</i> L. Phyllanthaceae MUH-1569                         | Aamla                | Mar. to Jun.     | W                                    | T | P | Fruit, leaf, seed/ decoction, pickle, powder | Oral and Topical | Stomach diseases, diabetes, and kidney disorders, asthma, jaundice and used as EVMs.                                                                       | 48  | 0.87 | 49  | 0.89 |
| 113.  | <i>Pinus roxburghii</i> Sarg. Pinaceae MUH-1255                               | Chir                 | Mar. to Jun.     | W                                    | T | P | Seed, Resin, leaf and bark/ decoction, tea   | Oral and Topical | Pimples, tumor, and control bleeding from wounds, stomach pain, repellents of insects and mosquito.                                                        | 45  | 0.82 | 53  | 0.96 |
| 114.  | <i>Plantago major</i> L. Plantaginaceae MUH-1533                              | Jangli Isamgol       | Aug. to Sep.     | W                                    | H | A | Leaf, seeds/ extract, tea                    | Oral and Topical | Pimples, wounds and sore pains, constipation and hypolipidemic.                                                                                            | 44  | 0.80 | 44  | 0.80 |
| 115.  | <i>Populus nigra</i> L. Salicaceae MUH-1604                                   | Peepal               | Apr. to May      | W                                    | H | A | Fruit, bark/ extract, tea                    | Oral and Topical | Cough, fever, cold, diuretic and used as EVMs.                                                                                                             | 43  | 0.78 | 46  | 0.84 |
| 116.  | <i>Portulaca oleracea</i> L. Portulacaceae MUH-1392                           | Kulfa                | Jun. to Sep.     | W                                    | H | A | Stem, root, leaf/ decoction, tea             | Oral and Topical | Constipation, febrifuge, vermifuge, bacterial infections, ulcer, inflammatory infirmities and wound-healing.                                               | 33  | 0.60 | 44  | 0.80 |

(Continued)

Table 3. (Continued)

| S. No | Botanical Names with Family                                                                                       | Local Name    | Flowering Period | Life Habit/<br>Life Form             |   |   | Part(s)/Form (s) of Usage            | Application mode | Phytotherapeutic Utilization as EMs and Phytonyms                                                                                                          | RFC | UV   | ΣUI | UVI  |
|-------|-------------------------------------------------------------------------------------------------------------------|---------------|------------------|--------------------------------------|---|---|--------------------------------------|------------------|------------------------------------------------------------------------------------------------------------------------------------------------------------|-----|------|-----|------|
|       |                                                                                                                   |               |                  | (with 55 Informants in the Analysis) |   |   |                                      |                  |                                                                                                                                                            |     |      |     |      |
| 117.  | <i>Punica granatum</i> L.<br>Punicaceae MUH-1382                                                                  | Darooona      | Apr. to Jul.     | W                                    | S | P | Leaf, fruit, bark/<br>decoction, tea | Oral and Topical | Tumors, fever, cooling and tonic of the body, cough, sore throats, skin disorders anthelmintic, stomach pains and cardiotoxic with hyperlipidemic effects. | 44  | 0.80 | 51  | 0.93 |
| 118.  | <i>Ranunculus muricatus</i> L.<br>Ranunculaceae MUH-1256                                                          | Buti          | Mar. to May.     | W                                    | H | A | Whole plant/<br>decoction            | Oral and Topical | Cough, asthma, snake bite, tumor, heart related diseases, snake and scorpion bites.                                                                        | 42  | 0.76 | 47  | 0.85 |
| 119.  | <i>Rhynchosia minima</i> (L.) DC.<br>Leguminosae; subfamily Papilionaceae MUH-1339                                | Ran ghavara   | Sep. to Oct.     | W                                    | H | A | Leaf, root, fruit/<br>tea, infusion  | Oral and Topical | Flatulence, indigestion, fever, whooping cough and abortifacient.                                                                                          | 45  | 0.82 | 54  | 0.98 |
| 120.  | <i>Rhynchosia pseudo-cajan</i> Camb.<br>Leguminosae; subfamily Papilionaceae MUH-1340                             | Ran bhot      | May to Jun.      | W                                    | H | A | Leaf, root, fruit/<br>decoction, tea | Oral and Topical | Flu, fever, cough, purgative and chest infections.                                                                                                         | 46  | 0.84 | 48  | 0.87 |
| 121.  | <i>Ricinus communis</i> L.<br>Euphorbiaceae MUH-1568                                                              | Harnoli       | Mar. to Oct.     | W                                    | H | A | Leaf, root, fruit/<br>decoction, tea | Oral and Topical | Skin and joints pains, diabetic drug, microbial ulcer, purgative and wormicidal.                                                                           | 41  | 0.75 | 47  | 0.85 |
| 122.  | <i>Rubus fruticosus</i> Hk.<br>Rosaceae MUH-1377                                                                  | Akhray        | Apr. to Oct.     | W                                    | H | A | Leaf, fruit /<br>decoction, tea      | Oral and Topical | Carminative, body tonic or vigour, sore throat, mouth bad smell and gum pains with inflammation.                                                           | 43  | 0.78 | 51  | 0.93 |
| 123.  | <i>Rumex dentatus</i> L.<br>Polygonaceae MUH-1377                                                                 | Jangli palak  | Apr. to Oct.     | W                                    | H | A | Leaf, whole plant /<br>infusion      | Oral and Topical | Urinary issues, astringent. The leaf juice is applied for control of irritation of <i>Urtica dioica</i> .                                                  | 38  | 0.69 | 45  | 0.82 |
| 124.  | <i>Saccharum bengalensis</i> Retz.<br>Poaceae MUH-1628                                                            | Sarkanda      | Jul. to Sep.     | W                                    | H | A | Leaf, stem/<br>decoction, tea        | Oral and Topical | Flatulence in cattle, ear pain and used as EVMs for cattle and rodents.                                                                                    | 22  | 0.40 | 36  | 0.65 |
| 125.  | <i>Salvia plebeia</i> R.Br.<br>Lamiaceae MUH-1530                                                                 | Somandri Sokh | Mar. to Jun.     | W                                    | H | A | Leaf, root/<br>decoction, infusion   | Oral and Topical | Insecticidal, burnt wound's pain reliever, piles, dysentery and used as EVMs.                                                                              | 34  | 0.62 | 37  | 0.67 |
| 126.  | <i>Schoenoplectus litoralis</i> (Schrad.) Palla subsp. <i>thermalis</i> (Trabut) S. Hooper<br>Cyperaceae MUH-1666 | Dapla         | Jun. to Sep.     | W                                    | H | A | Leaf, root/<br>powder, infusion      | Oral and Topical | Carminative, bite pains, stomach worms and digestive tonic.                                                                                                | 35  | 0.64 | 45  | 0.82 |
| 127.  | <i>Schoenoplectus lacustris</i> (L.) Palla, subsp. <i>lacustris</i><br>Cyperaceae MUH-1667                        | Kouna         | Jun. to Sep.     | W                                    | H | A | Leaf, root, flower/<br>infusion      | Oral and Topical | Diuretic, astringent and cure of tumors & boils.                                                                                                           | 34  | 0.62 | 44  | 0.80 |
| 128.  | <i>Sida cordifolia</i> L.<br>Malvaceae MUH-1301                                                                   | Sidu booti    | Apr. to Aug.     | W                                    | H | A | Leaf, fruit, seeds/<br>decoction     | Oral and Topical | Febrifuge, diuretic and demulcent agent, laxative and stomach pains.                                                                                       | 22  | 0.40 | 35  | 0.64 |
| 129.  | <i>Sida cordata</i> (Burm.f.) Borss. var. <i>cordata</i> .<br>Malvaceae MUH-1300                                  | Kalli buti    | All year         | W                                    | H | A | Leaf, fruit /<br>extract, poultice   | Oral and Topical | Wound, cold, flu, sore mouth cough, cuts, headache, nasal congestion and diarrhea.                                                                         | 25  | 0.45 | 42  | 0.76 |
| 130.  | <i>Sisymbrium irio</i> L.<br>Brassicaceae MUH-1272                                                                | Khob Kalan    | Mar. to May      | W                                    | H | A | Seeds, leaf/<br>decoction            | Oral and Topical | Expectorant, constipation, soar throat, pharynx problems of low voice, viral flus and cure of measles.                                                     | 45  | 0.82 | 34  | 0.62 |

(Continued)

Table 3. (Continued)

| S. No | Botanical Names with Family                                          | Local Name | Flowering Period | Life Habit/ Life Form |   |   | Part(s)/Form (s) of Usage                        | Application mode | Phytotherapeutic Utilization as EMs and Phytonyms                                                                                         | RFC                                  | UV   | ΣUI | UVI  |
|-------|----------------------------------------------------------------------|------------|------------------|-----------------------|---|---|--------------------------------------------------|------------------|-------------------------------------------------------------------------------------------------------------------------------------------|--------------------------------------|------|-----|------|
|       |                                                                      |            |                  |                       |   |   |                                                  |                  |                                                                                                                                           | (with 55 Informants in the Analysis) |      |     |      |
| 131.  | <i>Solanum nigrum</i> L.<br>Solanaceae MUH-1484                      | Kach Mach  | All the year     | W                     | H | A | Leaf, fruit, root/<br>decoction, tea             | Oral and Topical | Abortifacient, dropsy and hepatitis, kidney problems skin diseases, hepatitis, dysentery, stomachache and tumor cure.                     | 47                                   | 0.85 | 37  | 0.67 |
| 132.  | <i>Solanum surratense</i> Burm. f. Solanaceae MUH-1485               | Mokari     | Sep. to Mar.     | W                     | H | A | Leaf, fruit, root/<br>decoction, tea             | Oral and Topical | Expectorant, diuretic, cure of gonorrhoea, microbial infections, anti-protective, asthma, wound healing, flu, cough and fever.            | 35                                   | 0.64 | 47  | 0.85 |
| 133.  | <i>Sonchus asper</i> L. Asteraceae MUH-1412                          | Kohri      | Feb. to Apr.     | W                     | H | A | Whole plant/<br>decoction, tea                   | Oral and Topical | Bacterial infections, oxidative stress and diabetes                                                                                       | 24                                   | 0.44 | 35  | 0.64 |
| 134.  | <i>Stellaria media</i> (L.) Vill. Caryophyllaceae MUH-1286           | Chachunmba | Jan. to Apr.     | W                     | H | A | Leaf, whole plant/<br>decoction, poultice        | Oral and Topical | Carminative, diuretic, laxative, expectorant, astringent and vulnerary.                                                                   | 42                                   | 0.76 | 48  | 0.87 |
| 135.  | <i>Syzygium cumini</i> (L.) Skeels Myrtaceae MUH-1374                | Jaman      | Apr. to May      | W                     | T | P | Fruit, leaf, wood/<br>paste, decoction, infusion | Oral and Topical | Diabetes, bronchitis, hyperglycemia, astringent helminthic, sore throat, asthma, dysentery, concomitant thirst and ulcers.                | 47                                   | 0.85 | 49  | 0.89 |
| 136.  | <i>Taraxacum officinale</i> Weber. Asteraceae MUH-1406               | Handd      | Feb. to Apr.     | W                     | H | A | Leaf, whole plant, flower/<br>decoction, tea     | Oral and Topical | Diuretic, jaundice, heart problems, bandage with eggs as paste on broken bones, viral flu infections and wormicidal.                      | 42                                   | 0.76 | 51  | 0.93 |
| 137.  | <i>Terminalia bellerica</i> (Gaertn) Roxb. Combretaceae MUH-1578     | Baihra     | Apr. to Jun.     | W                     | T | P | Leaf, seed, flower, stem/<br>decoction, tea      | Oral and Topical | Stomach and colic pains, fever, asthma and skin, haemorrhoids and diarrhea. The plant is used as source ethnoveterinary medicines (EVMs). | 48                                   | 0.87 | 58  | 1.05 |
| 138.  | <i>Toona ciliata</i> M.Roem Meliaceae MUH-1323                       | Tun        | Mar. to Apr.     | W                     | T | P | Leaf, wood, bark/<br>decoction, tea              | Oral and Topical | Dysentery, blood diseases and stomach flatulence issues.                                                                                  | 34                                   | 0.62 | 47  | 0.85 |
| 139.  | <i>Trianthema portulacastrum</i> L. Aizoaceae MUH-1491               | It-sit     | Jun. to Sep.     | W                     | H | A | Leaf, root/<br>decoction, paste                  | Oral and Topical | Stomach problems, night blindness, inflammation, constipation, laxative tonic and analgesic.                                              | 26                                   | 0.47 | 44  | 0.80 |
| 140.  | <i>Tribulus terrestris</i> L. Zygophyllaceae MUH-1313                | Phakray    | Mar. to Jul.     | W                     | H | P | Seeds, leaf/<br>decoction, powder                | Oral and Topical | Body tonic, impotence and vigour, urinary, cystitis problems and aphrodisiac.                                                             | 41                                   | 0.75 | 49  | 0.89 |
| 141.  | <i>Urtica dioica</i> L. Urticaceae MUH-1574                          | Bichu boti | May to Sep.      | W                     | H | A | Leaf, root/<br>infusion, extract                 | Oral and Topical | Hay fever, jaundice, hepatitis, blood pressure, diabetes, menstrual problems and leucorrhoea.                                             | 33                                   | 0.60 | 44  | 0.80 |
| 142.  | <i>Vaccaria hispanica</i> (Mill.) Rauschert Caryophyllaceae MUH-1288 | Masna      | Feb. to Mar.     | W                     | H | A | Whole plant/<br>decoction                        | Oral and Topical | Skin, chest tumors, menstrual disorders, enhancement of lactation in mothers and itching on the body parts.                               | 25                                   | 0.45 | 36  | 0.65 |
| 143.  | <i>Vallis solanacea</i> (Roth) O. Kuntze Apocynaceae MUH-1288        | Dhudi      | Feb. to Mar.     | W                     | H | A | Leaf, stem, root/<br>decoction, infusion         | Oral and Topical | Skin infections, soar throat, wounds and cuts on body pains.                                                                              | 33                                   | 0.60 | 45  | 0.82 |

(Continued)

Table 3. (Continued)

| S. No | Botanical Names with Family                                           | Local Name | Flowering Period | Life Habit/ Life Form |   |   | Part(s)/Form (s) of Usage                          | Application mode  | Phytotherapeutic Utilization as EMs and Phytonyms                                                                                                    | RFC                                  | UV   | ΣUI | UVI  |
|-------|-----------------------------------------------------------------------|------------|------------------|-----------------------|---|---|----------------------------------------------------|-------------------|------------------------------------------------------------------------------------------------------------------------------------------------------|--------------------------------------|------|-----|------|
|       |                                                                       |            |                  |                       |   |   |                                                    |                   |                                                                                                                                                      | (with 55 Informants in the Analysis) |      |     |      |
| 144.  | <i>Viola canescens</i> Wall.ex Roxb. Violaceae MUH-1281               | Banafsha   | Mar. to Aug.     | W                     | H | A | Flower, root/ powder, tea, extract                 | Oral and Topical  | Flu, cold, fever, cough, soar throat, antipyretic, laxative in folklore tonics, malaria and tumors.                                                  | 45                                   | 0.82 | 59  | 1.07 |
| 145.  | <i>Withania coolgulans</i> L. Solanaceae MUH-1488                     | Paneer     | Feb. to Apr.     | W                     | H | A | Leaf, fruit / decoction, extract                   | Oral and Topical  | Insomnia, disability and fatigue, impotence and nervous exhaustion.                                                                                  | 54                                   | 0.98 | 64  | 1.16 |
| 146.  | <i>Withania somnifera</i> (L.) Dunal. Solanaceae MUH-1487             | Aksan      | Feb. to Apr.     | W                     | H | A | Fruit, leaf, root/ decoction, tea                  | Oral and Topical  | Boils, pimples and blisters, knees pains, dyspepsia, kidney problems, rheumatism, tumors, sex potential enhancer, bacterial and mycotic infirmities. | 52                                   | 0.95 | 68  | 1.24 |
| 147.  | <i>Zanthoxylum armatum</i> DC. Rutaceae MUH-1319                      | Timbar     | Mar. to Apr.     | W                     | S | P | Seed, stem, leaf, wood /paste, decoction, infusion | Oral and Topical  | Eye sights enhancer, carminative and digestives, stomachic fevers and toothache. The plant is used as source ethnoveterinary medicines (EVMs).       | 51                                   | 0.93 | 69  | 1.25 |
| 148.  | <i>Ziziphus mauritiana</i> Lam. var. Spontanea Rhamnaceae MUH-1329    | Jandi      | Mar. to Sep.     | W                     | T | P | Fruit, leaf/ decoction, tea, infusion              | Oral, and Topical | Obesity reducer, boils & pimples, dyspepsia, stomachache, fever, cough and used as EVMs.                                                             | 47                                   | 0.85 | 55  | 1.00 |
| 149.  | <i>Ziziphus nummularia</i> (Burm.f.) Wight & Arn. Rhamnaceae MUH-1328 | Kokan bair | Mar. to Sep.     | W                     | T | P | Fruit, leaf/ decoction, tea                        | Oral and Topical  | Obesity, blood purifier, diarrhea, anemia, snake biting, wound healing. The plant is used as source ethnoveterinary medicines (EVMs).                | 46                                   | 0.84 | 58  | 1.05 |
| 150.  | <i>Ziziphus jujuba</i> Mill. Rhamnaceae MUH-1330                      | Unaab      | Jun. to Jul.     | W                     | T | P | Fruit, leaf/ tea, poultice, extract                | Oral and Topical  | Diabetes, obesity, antimicrobial, wound healing, flu, cough and used as ethnoveterinary medicines (EVMs).                                            | 39                                   | 0.71 | 38  | 0.69 |

<https://doi.org/10.1371/journal.pone.0243151.t003>

from all parts or fruits of plants. These findings are coincident with previous works stating that decoction was the most prevalent use-form in TEMs promulgated in different areas of Pakistan [104–106] and world [107–112]. Sometime, plants are used as single recipe and sometime used as admixture in combination of different plants parts and later one is considered as the most efficient because synergistic (compound) ethnomedicines have high potential to cure infirmities [113]. Sometimes, salts or sugar are mixed with TEMs to produce better taste and aroma. Similar citations have been reported in past research works describing that decoction is prevalent mode of use [114, 115] which might be due to reason that it is easy to prepare and oral take in body [116, 117]. It is also found that decoction has more efficacy than other use-forms because it has more concentration of phytochemicals than tea or soup and same type of reports had been provided in the past publications [118, 119].

Although TEMs have been used in various forms but are oral administration ranked first (46.66%), followed by topical use/paste (45.92%) and gargle (10.45%) as shown in Fig 6. These findings were coincident with past works where it was stated that oral mode is preferred as it was easy to take in and also this provided instant relief from the disease [88, 120, 121]. It is

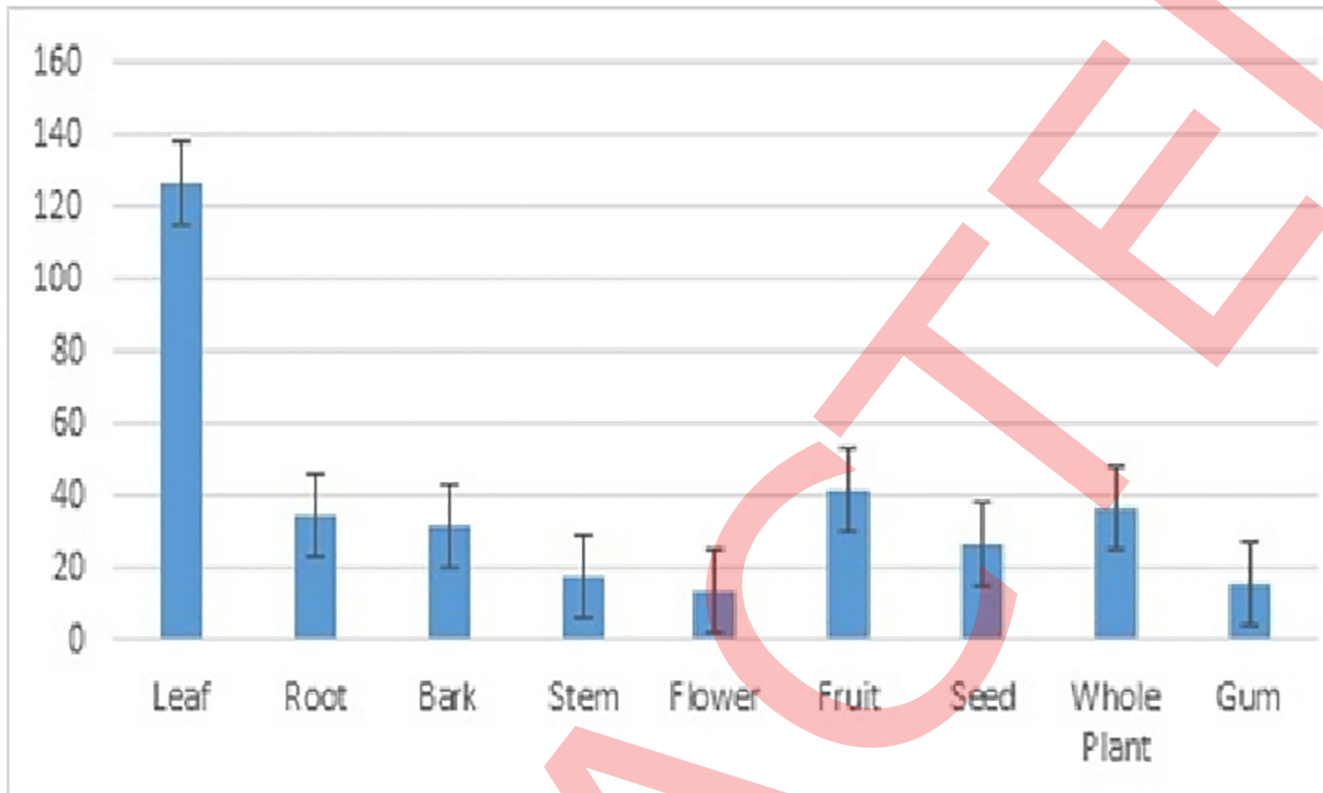

Fig 4. Percentage of plant parts used in preparation of TEMs in Samahni area of AJK.

<https://doi.org/10.1371/journal.pone.0243151.g004>

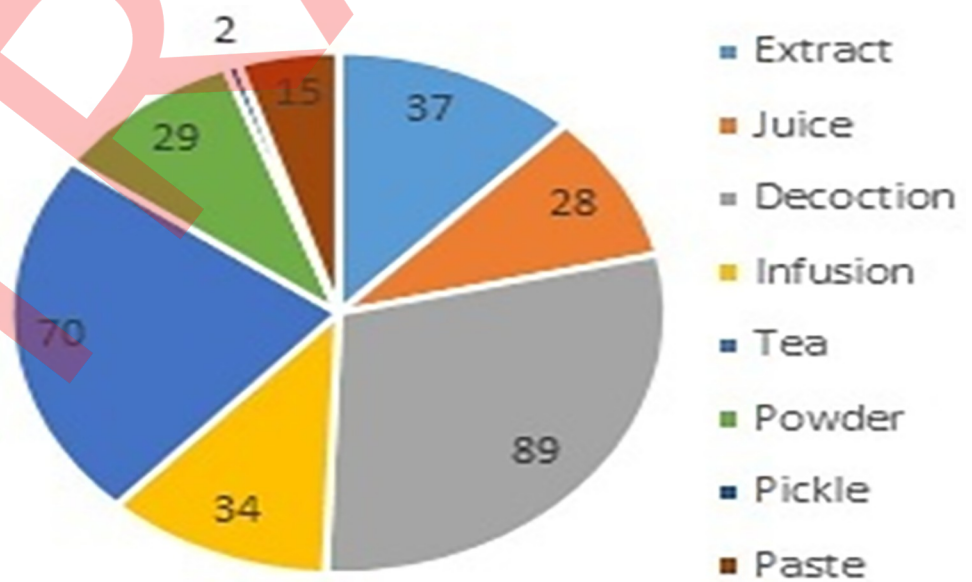

Fig 5. Mode of ethnomedicines used in study area, Samahni, AJK.

<https://doi.org/10.1371/journal.pone.0243151.g005>



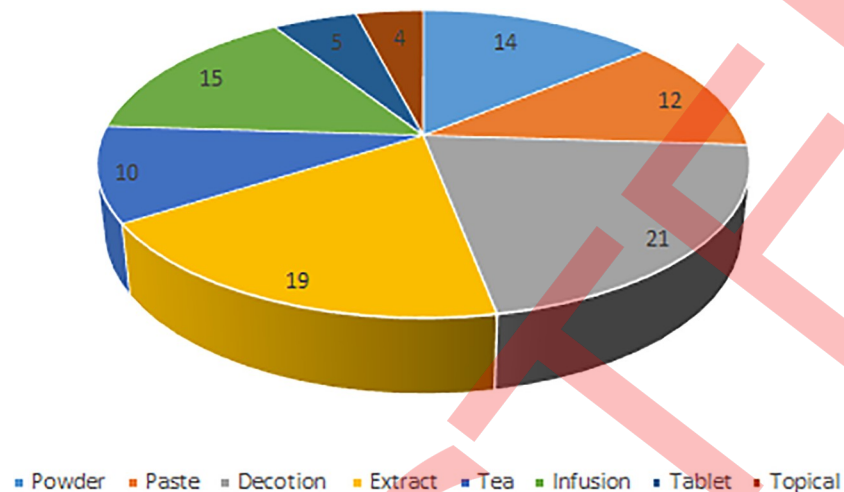

**Fig 6. Mode of administration of ethnomedicines by people of Samahni area of AJK.**

<https://doi.org/10.1371/journal.pone.0243151.g006>

reported here that use of TEMs in form of bathing and massage is also congruent with past works conducted in Gujranwala area of Pakistan. The study revealed that leaf of *Zizyphus mauritiana* and fruit of *Colocynthus lanatus* is powdered, mixed with oil and used as massage on the infirmities /pain area of body [8, 117].

### Informant consensus factor (ICF)

The informant consensus factor (ICF) was used as quantitative tool in this study to determine which infirmities were prevalent in the study area and what type of TEMs were used to cure these diseases. ICF was calculated by classifying the diseases into ten groups on the basis of the use-reports (Table 3). Among all diseases diabetics and blood pressure was ranked first with ICF value of 0.94, followed by Rabies and other sting pains (ICF: 0.93) and arthritis and joint disorders with ICF value of 0.91 (Fig 7).

These findings confirm that 'diabetes and blood pressure' were the most prevalently occurring diseases in the area that might be due to excessive use of fats/butter (ghee) and change of life towards sedentary and luxurious mode. The second common type of diseases were 'rabies

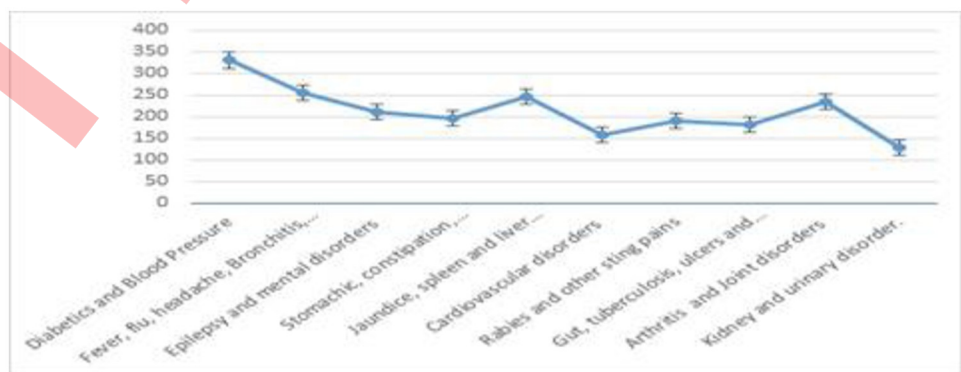

**Fig 7. Diseases prevalence with respect of use reports as per informants data of study area.**

<https://doi.org/10.1371/journal.pone.0243151.g007>

and other sting pains' followed by 'arthritis and joint disorders' which might be due to large occurrence of wild dogs, jackals and snakes in forest or dense plants areas of mountains of Samahni, AJK. The arthritis and knee pains were also common in the area that might be due to carrying of heavy carriage or luggage by inhabitants in form of woods and grasses to cope their daily life necessities. These findings were congruent with previous works [122–127]. The overall ICF values of the diseases occurring in the area were similar with studies conducted in different areas of Pakistan [90, 128] and Azad Kashmir [129, 130].

### Relative frequency of citation (RFC) and use value index (UVI)

The relative frequency of citation (RFC) and use value index (UVI) tools were applied to explore and determine the medicinal potential of plants and their potential for future pharmacological research and drug development. RFC confirmed the medicinal importance and acceptability of MPs with frequency of citations in the study area to cure various diseases. The RFC of medicinal plants species of the study area ranged from 0.22 to 0.95 (Table 3). The highest RFC (0.95) was found for *Acacia modesta* Wall., followed by *Boerhavia procumbens* Banks ex. Roxb. (RFC = 0.87), *Berberis lycium* Royle. (RFC = 0.85), *Ficus auriculata* Lour. (RFC = 0.83), *Carissa opaca* Stapf ex. Haines. (RFC = 0.80) and *Calotropis procera* (Aiton) Dryand (RFC = 0.75). The use value index (UVI) was calculated to find the relative importance of plants and their families in the local communities. The highest UVI was found for *Moringa oleifera* Lam. (1.38 value), followed by *Zanthoxylum armatum* DC. (1.25), *Withania somnifera* (L.) Dunal. (1.24), *Withania coolgulans* L. (1.16), *Mentha spicata* L. (1.13), *Terminalia belerica* (Gaertn) Roxb. (1.03) and *Justicia adhatoda* L. (1.00), respectively.

*Rhynchosia minima* (L.) DC. (0.97 value) and *Loranthus longiflorus* Desr. (0.95 value) as shown in Table 3. The higher values of index of UV determines that plants species are extensively used by the indigenous people for curing of different ailments. This is indication of popularity of the local medicinal flora in local culture. The plants which have low value of UVI confirms that these are less available in the area or those have less ethnomedicinal uses in the area. These findings are comparatively similar with previous studies of different areas of Pakistan. It has been reported that *Withania somnifera* (L.) Dunal. as used for cure of rheumatism, tumors, *Ziziphus nummularia* was used for treatment of stings and skin allergies. It is stated that *Solanum surratense* has many TEMs uses in local culture of the study area. Similar findings had been found in other studies of previous publications that the plant was known very medicinal in many traditional ethnomedicines [120–130]. Another plant *Withania somnifera* had also very effective TEM uses in local communities of the study area to cure sex and pregnancy problems [41]. *Solanum nigrum* is very important medicinal species being used in local folklore phytonyms and these findings are in congruent with past works [40, 41]. High values of RFC and UVI for these and other medicinal plants proved that these plants were prevalently known as medicinal plants of the area.

### Fidelity level (FL), relative popularity level (RPL), rank order of priority (ROP)

The fidelity level (FL), relative popularity level (RPL) and rank order of priority (ROP) indices were determined for 33 most predominant plants having highly medicinal values occurring in the study area (Table 4). FL of the plants ranged between 70% to 100%; in which *Phyllanthus emblica* L. had 100% FL which was used to cure hypertension, hyperlipidemia; *Melia azedarach* (L.) Pers. had FL of 100%, *Solanum surattense* Burm.f. had 100% FL and these were used to cure gonorrhoea, fever and least values of FL (70%) were explored for *Nerium oleander* L. which was used to cure stomachache, skin rashes in local therapeutics. High values of FL indicates

**Table 4. List of indigenous plants depicting highest therapeutic uses with FL, RPL, ROP from Samahni area of District Bhimber, Azad Jammu and Kashmir.**

|     | Plant Species                                           | Therapeutic Uses                             | N    | NA   | FL    | RPL | ROP   |
|-----|---------------------------------------------------------|----------------------------------------------|------|------|-------|-----|-------|
| 1.  | <i>Phyllanthus emblica</i> L.                           | Antihypertension, Antihyperlipidemic         | 80.0 | 80.0 | 100.0 | 1.0 | 100   |
| 2.  | <i>Morus macruora</i> Miq.                              | Cure Cough, Chest infection                  | 75.0 | 73.0 | 97.3  | 1.0 | 97    |
| 3.  | <i>Justicia adhatoda</i> L.                             | Diabetic, bacterial infection                | 78.0 | 69.0 | 88.5  | 1.0 | 89    |
| 4.  | <i>Melia azedarach</i> (L.) Pers.                       | Diabetic, blood problems                     | 80.0 | 80.0 | 100.0 | 1.0 | 96    |
| 5.  | <i>Solanum surattense</i> Burm.f.                       | Gonorrhoea, Fever                            | 65.0 | 65.0 | 100.0 | 0.9 | 92    |
| 6.  | <i>Solanum nigrum</i> L.                                | Hepatitis, spleen disorders                  | 60.0 | 55.0 | 91.7  | 0.9 | 81    |
| 7.  | <i>Ficus racemosa</i> L.                                | Piles, Constipation                          | 55.0 | 52.0 | 94.5  | 0.9 | 80    |
| 8.  | <i>Ziziphus nummularia</i> (Burm.f.) Wight & Arn.       | Skin disorder, anemia                        | 45.0 | 42.0 | 93.3  | 0.8 | 76    |
| 9.  | <i>Ficus palmata</i> Forssk.                            | Stomachache, constipation,                   | 44.0 | 41.0 | 93.2  | 0.8 | 73    |
| 10. | <i>Flacourtia indica</i> (Burm. f.) Merr.               | Jaundice, Liver disorder                     | 43.0 | 38.0 | 88.4  | 0.8 | 66    |
| 11. | <i>Albizia lebbek</i> (L.) Benth.                       | Kidney diseases                              | 38.0 | 34.0 | 89.5  | 0.7 | 59    |
| 12. | <i>Azadirachta indica</i> A. Juss.                      | Syphilis, wormicide                          | 37.0 | 36.0 | 97.3  | 0.6 | 62    |
| 13. | <i>Calotropis procera</i> (Aiton) Dryand.               | Snake and scorpion bite                      | 31.0 | 26.0 | 83.9  | 0.6 | 52    |
| 14. | <i>Carissa opaca</i> Stapf ex Haines.                   | jaundice and hepatitis                       | 28.0 | 22.0 | 78.6  | 0.6 | 46    |
| 15. | <i>Datura innoxia</i> Mill.                             | Flatulence, epilepsy                         | 22.0 | 19.0 | 86.4  | 0.5 | 47    |
| 16. | <i>Nerium oleander</i> L.                               | Stomachache, skin rashes                     | 20.0 | 14.0 | 70.0  | 0.5 | 32    |
| 17. | <i>Eruca sativa</i> L.                                  | Boils and pus blisters                       | 15.0 | 11.0 | 73.3  | 0.3 | 24    |
| 18. | <i>Flacourtia indica</i> (Burm. f.) Merill.             | Antihypertension, colic, eye sight enhancer  | 73.0 | 73.0 | 100.0 | 1.0 | 100.0 |
| 19. | <i>Mentha arvensis</i> L.                               | Vigour enhancer, stomachache                 | 77.0 | 73.0 | 94.8  | 1.0 | 94.8  |
| 20. | <i>Ajuga bracteosa</i> Wall ex Benth                    | Asthma, fever, hypertension                  | 71.0 | 65.0 | 91.5  | 1.0 | 91.5  |
| 21. | <i>Bombax ceiba</i> L.                                  | Anti-inflammation, menstrual disorders       | 77.0 | 75.0 | 97.4  | 1.0 | 93.5  |
| 22. | <i>Withania somnifera</i> (L.) Dunal.                   | Liver disorders, kidney pain, blood purifier | 80.0 | 80.0 | 100.0 | 0.9 | 92.0  |
| 23. | <i>Ziziphus jujuba</i> Mill.                            | Diabetes, Skin disorder                      | 65.0 | 64.0 | 98.5  | 0.9 | 86.6  |
| 24. | <i>Ficus variegata</i> Blume                            | Eyes diseases, diabetes                      | 55.0 | 51.0 | 92.7  | 0.9 | 78.8  |
| 25. | <i>Olea ferruginea</i> Wall. ex Aitch.                  | Gums and teeth diseases, diabetes            | 71.0 | 71.0 | 100.0 | 0.8 | 81.0  |
| 26. | <i>Toona ciliata</i> M.Roem                             | Haemorrhoids, diarrhoea and flatulence       | 66.0 | 65.0 | 98.5  | 0.8 | 76.8  |
| 27. | <i>Bauhinia variegata</i> L.                            | Hemorrhoids and jaundice                     | 62.0 | 55.0 | 88.7  | 0.8 | 66.5  |
| 28. | <i>Punica granatum</i> L.                               | Skin and hair problems                       | 55.0 | 52.0 | 94.5  | 0.7 | 62.4  |
| 29. | <i>Citrullus colocynthis</i> (L.) Shard                 | Syphilis and amenorrhea                      | 45.0 | 41.0 | 91.1  | 0.6 | 56.5  |
| 30. | <i>Allium jacquemontii</i> Kunth                        | Snake and scorpion poison lecuoderma         | 52.0 | 45.0 | 86.5  | 0.6 | 55.4  |
| 31. | <i>Amaranthus viridis</i> L.                            | Constipation and inflammation                | 26.0 | 24.0 | 92.3  | 0.5 | 49.8  |
| 32. | <i>Persicaria barbata</i> var. <i>barbata</i> (L.) Hara | Skin diseases, scabies                       | 20.0 | 18.0 | 90.0  | 0.5 | 40.5  |
| 33. | <i>Mentha spicata</i> L.                                | Toothache and headache                       | 19.0 | 16.0 | 84.2  | 0.3 | 28    |

<https://doi.org/10.1371/journal.pone.0243151.t004>

the prevalence of specific disease(s) in the local area and common use of the medicinal plants for curing these diseases [41, 129]. The findings were coincide with previous results of research works which stated that medicinal plants had been playing significant role in cure of many diseases in rural areas of Pakistan [122, 123].

The informants provided ethnomedicinal data of 150 plants and on basis of relative priority level (RPL) 33 important diseases' groups and highly medicinal plants of the area were prioritized in matrix form (Table 4). There is strong correlation between number of informants describing the particular plant species and number of usages as ethnomedicine (Fig 8) and there is also significant relationship between the number of informants citing the particular plant to cure a particular disease as described in Fig 9. It is known that number of uses increases when number of informants rises because of correlation coefficient factor  $r = 0.10$ . For example, if one plant species is cited by more 25 or more informants as ethnomedicine;

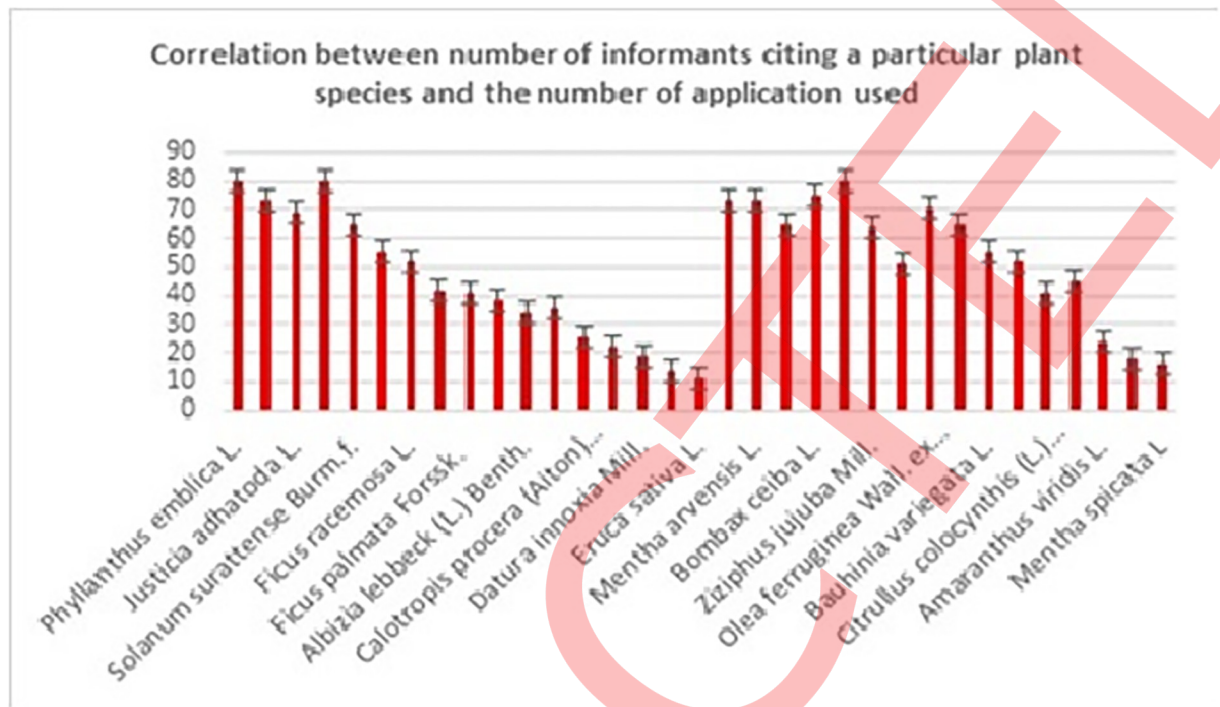

Fig 8. Depicting correlation between number of informants and number of TEMs use.

<https://doi.org/10.1371/journal.pone.0243151.g008>

the number of its relative popularity level (RPL) is ranked as raised and RPL is determined as percentage of ( $I_u / 25$ ) assigned score one (1) if cited or mentioned by the half or more number (12) of total informants (25) for any disease treatment and it is ranked as popular (P). If any plant is cited by less than 12 informants then RPL value will be ranked as unpopular (UP) (Amjad *et al.*, 2017). The marginalized values between P and UP of the plant is point where if informants number is increased then number of medicinal uses per plant species does not rise. These two tools of ethnobotany are commonly used for determination of commonly use-ness in the local area for cure of diseases.

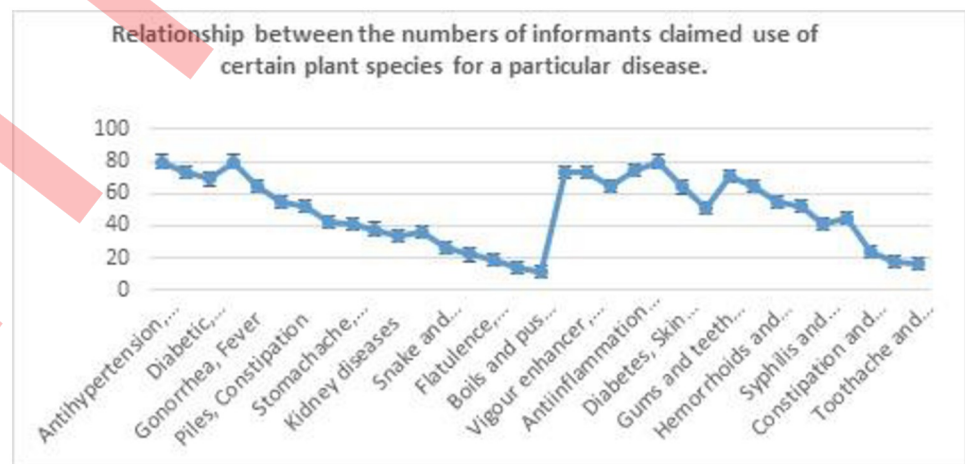

Fig 9. Depicting correlation between numbers of uses of plant and particular disease.

<https://doi.org/10.1371/journal.pone.0243151.g009>

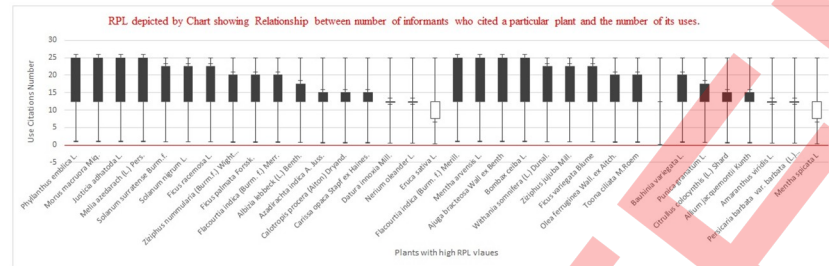

**Fig 10. Diagram depicting relationship between number of respondents who told TEMs use of particular plant and its use number.** Dark black area is depicting its RPL value.

<https://doi.org/10.1371/journal.pone.0243151.g010>

The protocol of “popular (P) and unpopular (UP)” demarcates plants into main two categories with reference of their cure potential for a specific disease. Out of one hundred and fifty medicinal plants; 33 plants species were selected for FL, RPL and ROP indices and highest RPL value (1.00) was found for *Phyllanthus emblica* L., *Morus macrocarpa* Miq., *Justicia adhatoda* L., *Melia azedarach* (L.) Pers., and *Ajuga bracteosa* Wall ex Benth. each (Fig 10) which proved that these plants were the most popular source of TEMs in the study area. The high RPL values of these plant species may be referred to their significant medicinal potential and similarly the awareness and reliability of the local people on these medicinal plants. These findings are in consistent with past studies about the medicinal plants of different areas of the Pakistan [124] and world [125, 126, 129, 130].

The third quantitative index Rank order priority (ROP) was used for validation and confirmation of medicinal qualities of the plants reported by indigenous communities of Samahni area. This index is correlated with FL & RPL and it may be assigned the name of correction factor, primarily used when FL values are different from RPL. The RPL and FL values along with ROP are presented in Table 4. It was explored that ROP values ranged between 24–100 and out of thirty three species of plants 26 species had more than 50 values of ROP. The highest ROP (100) was found for *Phyllanthus emblica* L. and *Flacourtia indica* (Burm. f.) Merril., followed by *Morus macrocarpa* Miq. (with 97.0 ROP value) which were reported to be used to cure hypertension and hyperlipidemia and cough, chest infection, respectively. The least ROP value (24) was found for *Eruca sativa* L. The higher ROP values than 50 means that these plants were predominantly used in local therapeutics and TEMs in the study area. The plant *Justicia adhatoda* L. had ROP of 89 and was used to treat diabetes and bacterial infections, while *Solanum surattense* Burm.f. with ROP of 92 was used to cure gonorrhoea and fever. These findings were inlined with previous research works conducted on ethnomedicinal studies in different regions of Pakistan [87] and world [124, 129]. The low ROP of some reported plants in this study indicate that either these plants might be not easily available in the area or people use these plants less due to certain unknown reasons. This demands to do further ethnopharmacological and conservation work in the area to protect and conserve these medicinal plants which will also assist in documentation and preservation of bioculture and traditional ethnobotanical knowledge of the indigenous communities.

### Relative importance of plants and relative pharmaceutical significance of the most commonly used indigenous plants

In this parameter, drug development prospective and potential of the medicinal plants (MPs) is calculated by using formula of relative importance of plants (RIP) which is based on its relative pharmacological (reh. Ph.) properties of a species and body systems (BS) cured. Moreover, the multiple use of these MPs as agricultural products (agro-uses) with trade potential was also

determined to prove their multiple-use, popularity and financial impact on life of local communities of the study areas (Table 5). The studies revealed that ethnopharmacological potential was described by using RIP which ranged between: 20.4 to 90.8. The highest RIP (90.80) was found for *Azadirachta indica* A. Juss. with good number of agro-uses and its seeds and bark were sold in local markets and used in herbal therapeutics by indigenous practitioners. Followed by *Justicia adhatoda* L. with RIP (90.4) and *Juglans regia* L. having RIP: 88.3 while least RIP value (20.4) was found for *Cynodon dactylon* (L.) Pers. It was determined that MPs having less RIP values means that these plants have less medicinal or ethnopharmacological uses in TEMs in the study area. The other plants like: *Phyllanthus emblica* L. (RIP:80), *Terminalia arjuna* L. (RIP: 83.3), *Zanthoxylum armatum* DC. (RIP:79.6), *Moringa oleifera* Lam. (RIP:87.8) and *Morus macruora* Miq. (RIP: 79.2) depicted that these have high popularity in indigenous medicinal therapeutics and they can be declared as potential plants species for further ethnopharmacological pharmaceutical analysis to discover drug for infirmities treatment at larger scale. These findings are congruent with previous works [27, 28, 58, 62].

### Innovation and future prospective of research

The current research is the first quantitative study comprising of 150 plant species used in traditional ethnomedicines (TEMs) in rural mountainous area of Samahni, District Bhimber of Azad Jammu and Kashmir, Pakistan. The study is very innovative as it is first quantitative ethnomedicinal research work conducted on prevalently used plants in TEMs in the study area. These ethnomedicinal findings are compared with previous research works conducted in District Bhimber of Azad Kashmir [3, 6, 19, 31, 32–34] other parts of AJK [114–117, 119, 120] and different areas of Pakistan [121–130]. As medicinal plants reported here are first time properly documented and authenticated using quantitative statistical tools and many of these wild plants are first time reported here in this study as medicinal species. The key importance of this research is that it has different recipes with mode of use determined by RPL, ROP and ICF which contains famous folklore phytotherapeutics viz: *Clematis connata* DC. (boils and tumors), *Cordia gharaf* (Forssk.) Ehren ex. Asch. (fever, cough, diuretic, demulcent, stomachache), *Echinocloa crus-galli* L. (spleen disorders, skin allergies), *Ficus palmata* Forssk. (stomachache, diabetes, toothache), *Flacourtia indica* (Burm.f.) Merill. (liver disorders, anti-malarial), *Allium jacquemontii* Kunth. (snake bite, sting of scorpion) and *Aloe vera* (L.) Burm. f. (piles, anal irritation, diabetics, baldness, wound healing, skin diseases). In this study, the plants species with high RPL and FL values might be recommended for further phytochemical and ethnopharmacological research to discover novel drugs and produce allopathic drugs at industrial level by using pharmaceutical research protocols to cope with emerging resistant pathogenic microbes for safe and better health of human beings. Future conservation work for rare medicinal plants species of the area is urgent need of time.

### Conclusion and recommendations

The current study confirms that TEMs obtained from plants are major source of medication used by rural and mountainous communities of the Samahni area of AJK, Pakistan. The local people hitherto are dependent on “green or botanic drugs” obtained from wild flora of the area. Although allopathic medicines are available in nearby District headquarters but still majority of the people prefer to use TEMs to cure different infirmities because indigenous people consider that botanic drugs are easy to collect and prepare, cheap, nontoxic and have better synergistic impact for treatment of chronic and acute diseases. This research work will provide the foundation linkage among rural dwellers, local herbalists and scientific researchers because it may lead towards discovering of neo-medicines through dedicated procedures and

**Table 5. Relative importance of plants and relative pharmaceutical significance of the most commonly used indigenous plants by the local people of different areas of Samahni, AJK, Pakistan and agro use and export status.**

| S No | Botanical Names                               | No. Ph. | Rel. Ph. | No. BS | Rel. BS. | RIP  | Agro Use | Trade |
|------|-----------------------------------------------|---------|----------|--------|----------|------|----------|-------|
| 01.  | <i>Acacia modesta</i> Wall.                   | 12      | 0.3      | 6      | 0.4      | 35.0 | Y        | Y     |
| 02.  | <i>Acacia nilotica</i> (L.) Delile            | 9       | 0.2      | 7      | 0.5      | 34.6 | Y        | Y     |
| 03.  | <i>Achyranthus aspera</i> L.                  | 24      | 0.6      | 9      | 0.6      | 60.0 | N        | Y     |
| 04.  | <i>Aerva sanguinolenta</i> (L.) Blume         | 25      | 0.6      | 11     | 0.7      | 67.9 | N        | Y     |
| 05.  | <i>Ajuga bracteosa</i> Wall ex Benth.         | 28      | 0.7      | 13     | 0.9      | 78.3 | N        | Y     |
| 06.  | <i>Albizia lebbeck</i> (L.) Benth.            | 7       | 0.2      | 10     | 0.7      | 42.1 | Y        | N     |
| 07.  | <i>Allium jacquemontii</i> Kunth              | 9       | 0.2      | 8      | 0.5      | 37.9 | N        | N     |
| 08.  | <i>Aloe vera</i> (L.) Burm. f.                | 23      | 0.6      | 13     | 0.9      | 72.1 | N        | Y     |
| 09.  | <i>Alternanthera pungens</i> L.               | 22      | 0.6      | 11     | 0.7      | 64.2 | N        | N     |
| 10.  | <i>Amaranthus viridis</i> L.                  | 15      | 0.4      | 9      | 0.6      | 48.8 | N        | N     |
| 11.  | <i>Artemisia scoparia</i> Waldst. & Kit.      | 16      | 0.4      | 9      | 0.6      | 50.0 | N        | N     |
| 12.  | <i>Artemisia vulgaris</i> L.                  | 18      | 0.5      | 8      | 0.5      | 49.2 | N        | N     |
| 13.  | <i>Azadirachta indica</i> A. Juss.            | 38      | 1.0      | 13     | 0.9      | 90.8 | Y        | Y     |
| 14.  | <i>Bauhinia variegata</i> L.                  | 33      | 0.8      | 12     | 0.8      | 81.3 | Y        | Y     |
| 15.  | <i>Berberis lycium</i> Royle.                 | 23      | 0.6      | 11     | 0.7      | 65.4 | N        | Y     |
| 16.  | <i>Boerhavia procumbens</i> Banks ex Roxb.    | 31      | 0.8      | 12     | 0.8      | 78.8 | N        | Y     |
| 17.  | <i>Boerhavia diffusa</i> L.                   | 36      | 0.9      | 10     | 0.7      | 78.3 | N        | Y     |
| 18.  | <i>Bombax ceiba</i> L.                        | 12      | 0.3      | 6      | 0.4      | 35.0 | Y        | N     |
| 19.  | <i>Bromus japonicus</i> L.                    | 9       | 0.2      | 7      | 0.5      | 34.6 | N        | N     |
| 20.  | <i>Butea monosperma</i> (Lam.) Taub.          | 15      | 0.4      | 5      | 0.3      | 35.4 | Y        | N     |
| 21.  | <i>Calotropis procera</i> (Aiton) Dryand.     | 24      | 0.6      | 8      | 0.5      | 56.7 | N        | N     |
| 22.  | <i>Capparis decidua</i> (Forssk.) Edgew.      | 26      | 0.7      | 6      | 0.4      | 52.5 | N        | N     |
| 23.  | <i>Capparis sepiaria</i> L.                   | 24      | 0.6      | 9      | 0.6      | 60.0 | N        | N     |
| 24.  | <i>Carissa opaca</i> Stapf ex Haines.         | 29      | 0.7      | 11     | 0.7      | 72.9 | N        | N     |
| 25.  | <i>Caryopteris odorata</i> (D. Don) B. Rob.   | 12      | 0.3      | 8      | 0.5      | 41.7 | N        | N     |
| 26.  | <i>Celtis eriocarpa</i> Decne.                | 14      | 0.4      | 5      | 0.3      | 34.2 | N        | Y     |
| 27.  | <i>Cuscuta reflexa</i> Roxb.                  | 18      | 0.5      | 4      | 0.3      | 35.8 | N        | N     |
| 28.  | <i>Casearia tomentosa</i> Roxb.               | 16      | 0.4      | 7      | 0.5      | 43.3 | N        | N     |
| 29.  | <i>Cassia fistula</i> L.                      | 13      | 0.3      | 7      | 0.5      | 39.6 | Y        | N     |
| 30.  | <i>Cenchrus biflorus</i> Roxb.                | 11      | 0.3      | 5      | 0.3      | 30.4 | N        | N     |
| 31.  | <i>Ceropegia bulbosa</i> L.                   | 18      | 0.5      | 8      | 0.5      | 49.2 | N        | N     |
| 32.  | <i>Chenopodium album</i> L.                   | 26      | 0.7      | 6      | 0.4      | 52.5 | N        | N     |
| 33.  | <i>Cichorium intybus</i> L.                   | 15      | 0.4      | 5      | 0.3      | 35.4 | N        | N     |
| 34.  | <i>Cirsium arvensis</i> (L.) Scop.            | 22      | 0.6      | 6      | 0.4      | 47.5 | N        | N     |
| 35.  | <i>Citrullus colocynthis</i> (L.) Shard       | 27      | 0.7      | 8      | 0.5      | 60.4 | N        | Y     |
| 36.  | <i>Clematis grata</i> Wall.                   | 23      | 0.6      | 9      | 0.6      | 58.8 | N        | Y     |
| 37.  | <i>Clematis graveolens</i> Lindl.             | 21      | 0.5      | 11     | 0.7      | 62.9 | N        | N     |
| 38.  | <i>Clematis connata</i> DC.                   | 20      | 0.5      | 10     | 0.7      | 58.3 | N        | N     |
| 39.  | <i>Colebrookea oppositifolia</i> Smith.       | 19      | 0.5      | 9      | 0.6      | 53.8 | N        | N     |
| 40.  | <i>Commelina benghalensis</i> L.              | 22      | 0.6      | 6      | 0.4      | 47.5 | N        | Y     |
| 41.  | <i>Convolvulus arvensis</i> L.                | 11      | 0.3      | 5      | 0.3      | 30.4 | N        | N     |
| 42.  | <i>Corchorus olitorius</i> L.                 | 14      | 0.4      | 4      | 0.3      | 30.8 | N        | N     |
| 43.  | <i>Cordia gharaf</i> (Forssk.) Ehren. ex Asch | 15      | 0.4      | 7      | 0.5      | 42.1 | N        | N     |
| 44.  | <i>Cordia obliqua</i> L.                      | 27      | 0.7      | 9      | 0.6      | 63.8 | Y        | Y     |
| 45.  | <i>Cymbopogon citratus</i> (John) Schutt      | 22      | 0.6      | 4      | 0.3      | 40.8 | N        | N     |
| 46.  | <i>Cynodon dactylon</i> (L.) Pers.            | 11      | 0.3      | 2      | 0.1      | 20.4 | N        | N     |

(Continued)

Table 5. (Continued)

| S No | Botanical Names                                    | No. Ph. | Rel. Ph. | No. BS | Rel. BS. | RIP  | Agro Use | Trade |
|------|----------------------------------------------------|---------|----------|--------|----------|------|----------|-------|
| 47.  | <i>Datura innoxia</i> Mill                         | 28      | 0.7      | 8      | 0.5      | 61.7 | N        | N     |
| 48.  | <i>Datura stramonium</i> L.                        | 29      | 0.7      | 9      | 0.6      | 66.3 | N        | N     |
| 49.  | <i>Digera muricata</i> (L.) Mart.                  | 22      | 0.6      | 5      | 0.3      | 44.2 | N        | N     |
| 50.  | <i>Eruca sativa</i>                                | 27      | 0.7      | 6      | 0.4      | 53.8 | N        | N     |
| 51.  | <i>Euphorbia helioscopia</i> L.                    | 22      | 0.6      | 7      | 0.5      | 50.8 | N        | N     |
| 52.  | <i>Euphorbia heterophylla</i> L.                   | 11      | 0.3      | 4      | 0.3      | 27.1 | N        | N     |
| 53.  | <i>Euphorbia hirta</i> L.                          | 8       | 0.2      | 6      | 0.4      | 30.0 | N        | N     |
| 54.  | <i>Euphorbia indica</i> Lam.                       | 8       | 0.2      | 7      | 0.5      | 33.3 | N        | N     |
| 55.  | <i>Euphorbia prolifera</i> Buch.-Ham.              | 9       | 0.2      | 6      | 0.4      | 31.3 | N        | N     |
| 56.  | <i>Euphorbia prostrata</i> Ait.                    | 11      | 0.3      | 4      | 0.3      | 27.1 | N        | N     |
| 57.  | <i>Ficus auriculata</i> Lour.                      | 25      | 0.6      | 8      | 0.5      | 57.9 | Y        | Y     |
| 58.  | <i>Ficus benghalensis</i> L.                       | 28      | 0.7      | 9      | 0.6      | 65.0 | Y        | Y     |
| 59.  | <i>Ficus palmata</i> Forssk.                       | 20      | 0.5      | 7      | 0.5      | 48.3 | Y        | Y     |
| 60.  | <i>Ficus religiosa</i> L.                          | 17      | 0.4      | 8      | 0.5      | 47.9 | Y        | Y     |
| 61.  | <i>Ficus semicordata</i> Buch.-Ham. ex Sm.         | 28      | 0.7      | 9      | 0.6      | 65.0 | Y        | Y     |
| 62.  | <i>Ficus variegata</i> Blume                       | 26      | 0.7      | 6      | 0.4      | 52.5 | Y        | Y     |
| 63.  | <i>Ficus racemosa</i> L.                           | 25      | 0.6      | 8      | 0.5      | 57.9 | Y        | Y     |
| 64.  | <i>Flacourtia indica</i> (Burm. f.) Merrill.       | 22      | 0.6      | 11     | 0.7      | 64.2 | Y        | N     |
| 65.  | <i>Fumaria indica</i> (Hausskn.) Pugs.             | 25      | 0.6      | 11     | 0.7      | 67.9 | N        | N     |
| 66.  | <i>Gloriosa superba</i> L.                         | 23      | 0.6      | 10     | 0.7      | 62.1 | N        | N     |
| 67.  | <i>Galium aparine</i> L.                           | 16      | 0.4      | 12     | 0.8      | 63.4 | N        | N     |
| 68.  | <i>Grewia optiva</i> J.R. Drumm. ex Burret         | 29      | 0.7      | 14     | 0.9      | 79.2 | Y        | N     |
| 69.  | <i>Ipomoea carnea</i> Jacq.                        | 22      | 0.6      | 11     | 0.7      | 64.2 | N        | N     |
| 70.  | <i>Ipomoea eriocarpa</i> R.Br.                     | 25      | 0.6      | 8      | 0.5      | 57.9 | N        | N     |
| 71.  | <i>Ipomoea cairica</i> (L.) Sweet                  | 23      | 0.6      | 9      | 0.6      | 58.8 | N        | N     |
| 72.  | <i>Juglans regia</i> L.                            | 36      | 0.9      | 13     | 0.9      | 88.3 | Y        | Y     |
| 73.  | <i>Justicia adhatoda</i> L.                        | 35      | 0.9      | 14     | 0.9      | 90.4 | Y        | N     |
| 74.  | <i>Kickxia ramosissima</i> (Wall.) Janchen         | 12      | 0.3      | 8      | 0.5      | 41.7 | N        | N     |
| 75.  | <i>Kyllinga brevifolia</i> Rottb.                  | 11      | 0.3      | 4      | 0.3      | 27.1 | N        | N     |
| 76.  | <i>Launea procumbens</i> Roxb.                     | 22      | 0.6      | 12     | 0.8      | 67.5 | N        | N     |
| 77.  | <i>Lindenbergia macrostachya</i> (Bth.) Bth.       | 16      | 0.4      | 6      | 0.4      | 40.0 | N        | N     |
| 78.  | <i>Loranthus longiflorus</i> Desr.                 | 15      | 0.4      | 5      | 0.3      | 35.4 | N        | N     |
| 79.  | <i>Loranthus pulverulentus</i> Wall.               | 22      | 0.6      | 7      | 0.5      | 50.8 | N        | N     |
| 80.  | <i>Mallotus philipiensis</i> (Lamk.) Mll. Arg.     | 25      | 0.6      | 4      | 0.3      | 44.6 | Y        | N     |
| 81.  | <i>Malva parviflora</i> L.                         | 22      | 0.6      | 7      | 0.5      | 50.8 | N        | N     |
| 82.  | <i>Malva sylvestris</i> L.                         | 12      | 0.3      | 5      | 0.3      | 31.7 | N        | N     |
| 83.  | <i>Malvastrum coromandelianum</i> (L.) Gk          | 22      | 0.6      | 8      | 0.5      | 54.2 | N        | N     |
| 84.  | <i>Maytenus Royleana</i> (W.ex.Laws.) Cudf.        | 23      | 0.6      | 7      | 0.5      | 52.1 | Y        | N     |
| 85.  | <i>Medicago polymorpha</i> L.                      | 24      | 0.6      | 5      | 0.3      | 46.7 | N        | N     |
| 86.  | <i>Medicago laciniata</i> var. <i>laciniata</i> L. | 12      | 0.3      | 4      | 0.3      | 28.3 | N        | N     |
| 87.  | <i>Melia azedarach</i> (L.) Pers.                  | 29      | 0.7      | 11     | 0.7      | 72.9 | Y        | Y     |
| 88.  | <i>Melilotus alba</i> L.                           | 23      | 0.6      | 10     | 0.7      | 62.1 | N        | N     |
| 89.  | <i>Melilotus indica</i> (L.) All.                  | 22      | 0.6      | 6      | 0.4      | 47.5 | N        | N     |
| 90.  | <i>Mentha arvensis</i> L.                          | 31      | 0.8      | 8      | 0.5      | 65.4 | N        | N     |
| 91.  | <i>Mentha royleana</i> Benth.                      | 32      | 0.8      | 9      | 0.6      | 70.0 | N        | N     |
| 92.  | <i>Mentha spicata</i> L.                           | 34      | 0.9      | 9      | 0.6      | 72.5 | N        | Y     |
| 93.  | <i>Moringa oleifera</i> Lam.                       | 31      | 0.8      | 12     | 0.8      | 78.8 | Y        | Y     |

(Continued)



Table 5. (Continued)

| S No | Botanical Names                                                                           | No. Ph. | Rel. Ph. | No. BS | Rel. BS. | RIP  | Agro Use | Trade |
|------|-------------------------------------------------------------------------------------------|---------|----------|--------|----------|------|----------|-------|
| 94.  | <i>Morus macruora</i> Miq.                                                                | 34      | 0.9      | 11     | 0.7      | 79.2 | Y        | Y     |
| 95.  | <i>Morus alba</i> (L.) Roxb.                                                              | 29      | 0.7      | 12     | 0.8      | 76.3 | Y        | Y     |
| 96.  | <i>Morus serrata</i> Roxb.                                                                | 25      | 0.6      | 10     | 0.7      | 64.6 | Y        | Y     |
| 97.  | <i>Morus nigra</i> L.                                                                     | 26      | 0.7      | 12     | 0.8      | 72.5 | Y        | N     |
| 98.  | <i>Nerium oleander</i> L.                                                                 | 16      | 0.4      | 10     | 0.7      | 53.3 | Y        | N     |
| 99.  | <i>Nicotiana plumbaginifolia</i> Viv.                                                     | 12      | 0.3      | 8      | 0.5      | 41.7 | N        | N     |
| 100. | <i>Olea ferruginea</i> Wall. ex Aitch.                                                    | 28      | 0.7      | 11     | 0.7      | 71.7 | Y        | N     |
| 101. | <i>Otostegia limbata</i> (Bth.) Bioss.                                                    | 22      | 0.6      | 8      | 0.5      | 54.2 | N        | N     |
| 102. | <i>Oxalis corniculata</i> L.                                                              | 24      | 0.6      | 9      | 0.6      | 60.0 | N        | N     |
| 103. | <i>Papaver hybridum</i> L.                                                                | 25      | 0.6      | 7      | 0.5      | 54.6 | N        | N     |
| 104. | <i>Papaver somnifera</i> L.                                                               | 23      | 0.6      | 9      | 0.6      | 58.8 | N        | Y     |
| 105. | <i>Persicaria barbata</i> (L.) Hara                                                       | 26      | 0.7      | 11     | 0.7      | 69.2 | N        | N     |
| 106. | <i>Phalaris minor</i> L.                                                                  | 21      | 0.5      | 4      | 0.3      | 39.6 | N        | N     |
| 107. | <i>Phoenix sylvestris</i> (L.) Roxb.                                                      | 24      | 0.6      | 8      | 0.5      | 56.7 | N        | N     |
| 108. | <i>Phyllanthus emblica</i> L.                                                             | 32      | 0.8      | 12     | 0.8      | 80.0 | Y        | Y     |
| 109. | <i>Pinus roxburghii</i> Sargent                                                           | 33      | 0.8      | 9      | 0.6      | 71.3 | Y        | Y     |
| 110. | <i>Plantago major</i> L.                                                                  | 28      | 0.7      | 5      | 0.3      | 51.7 | N        | N     |
| 111. | <i>Populus nigra</i> L.                                                                   | 20      | 0.5      | 11     | 0.7      | 61.7 | N        | Y     |
| 112. | <i>Portulaca oleracea</i> L.                                                              | 16      | 0.4      | 6      | 0.4      | 40.0 | N        | N     |
| 113. | <i>Punica granatum</i> L.                                                                 | 18      | 0.5      | 9      | 0.6      | 52.5 | N        | N     |
| 114. | <i>Ranunculus muricatus</i> L.                                                            | 13      | 0.3      | 4      | 0.3      | 29.6 | N        | N     |
| 115. | <i>Rhynchosia minima</i> (L.) DC.                                                         | 22      | 0.6      | 5      | 0.3      | 44.2 | N        | N     |
| 116. | <i>Rhynchosia pseudo-cajan</i> Camb.                                                      | 24      | 0.6      | 9      | 0.6      | 60.0 | N        | N     |
| 117. | <i>Ricinus communis</i> L.                                                                | 22      | 0.6      | 5      | 0.3      | 44.2 | N        | N     |
| 118. | <i>Rubus fruticosus</i> Hk.                                                               | 11      | 0.3      | 6      | 0.4      | 33.8 | N        | N     |
| 119. | <i>Rumex dentatus</i> L.                                                                  | 12      | 0.3      | 7      | 0.5      | 38.3 | N        | N     |
| 120. | <i>Saccharum bengalensis</i> Retz.                                                        | 9       | 0.2      | 8      | 0.5      | 37.9 | N        | N     |
| 121. | <i>Salvia plebeia</i> R.Br.                                                               | 5       | 0.1      | 5      | 0.3      | 22.9 | N        | N     |
| 122. | <i>Saussurea heteromalla</i> (Don)Hand. Mz                                                | 14      | 0.4      | 9      | 0.6      | 47.5 | N        | N     |
| 123. | <i>Schoenoplectus lacustris</i> (L.) Palla                                                | 19      | 0.5      | 5      | 0.3      | 40.4 | N        | N     |
| 124. | <i>Schoenoplectus litoralis</i> (Schrad.) Palla subsp. <i>thermalis</i> (Trabut) S.Hooper | 22      | 0.6      | 6      | 0.4      | 47.5 | N        | N     |
| 125. | <i>Sida cordifolia</i> L.                                                                 | 12      | 0.3      | 3      | 0.2      | 25.0 | N        | N     |
| 126. | <i>Sida cordata</i> (Burm.f.) Borss.                                                      | 14      | 0.4      | 5      | 0.3      | 34.2 | N        | N     |
| 127. | <i>Sisymbrium irio</i> L.                                                                 | 19      | 0.5      | 9      | 0.6      | 53.8 | N        | Y     |
| 128. | <i>Solanum nigrum</i> L.                                                                  | 30      | 0.8      | 8      | 0.5      | 64.2 | N        | Y     |
| 129. | <i>Solanum surattense</i> Burm. f.                                                        | 31      | 0.8      | 5      | 0.3      | 55.4 | N        | Y     |
| 130. | <i>Sonchus asper</i> L.                                                                   | 22      | 0.6      | 7      | 0.5      | 50.8 | N        | N     |
| 131. | <i>Stellaria media</i> (L.) Vill.                                                         | 12      | 0.3      | 7      | 0.5      | 38.3 | N        | N     |
| 132. | <i>Syzygium cumini</i> (L.) Skeels                                                        | 27      | 0.7      | 8      | 0.5      | 60.4 | N        | Y     |
| 133. | <i>Taraxacum officinale</i> Weber.                                                        | 29      | 0.7      | 12     | 0.8      | 76.3 | N        | N     |
| 134. | <i>Terminalia arjuna</i> L.                                                               | 34      | 0.9      | 11     | 0.7      | 82.9 | Y        | Y     |
| 135. | <i>Terminalia belerica</i> (Gaertn) Roxb.                                                 | 32      | 0.8      | 13     | 0.9      | 83.3 | Y        | Y     |
| 136. | <i>Toona ciliate</i> M. Roem                                                              | 12      | 0.3      | 4      | 0.3      | 28.3 | Y        | N     |
| 137. | <i>Trianthema portulacastrum</i> L.                                                       | 21      | 0.5      | 5      | 0.3      | 42.9 | N        | N     |
| 138. | <i>Tribulus terrestris</i> L.                                                             | 25      | 0.6      | 7      | 0.5      | 54.6 | N        | N     |
| 139. | <i>Urtica dioica</i> L.                                                                   | 21      | 0.5      | 5      | 0.3      | 42.9 | N        | N     |
| 140. | <i>Vaccaria hispanica</i> (Mill.) Rauschert                                               | 12      | 0.3      | 3      | 0.2      | 25.0 | N        | N     |

(Continued)

Table 5. (Continued)

| S No | Botanical Names                                | No. Ph. | Rel. Ph. | No. BS | Rel. BS. | RIP  | Agro Use | Trade |
|------|------------------------------------------------|---------|----------|--------|----------|------|----------|-------|
| 141. | <i>Vallisneria spiralis</i> (L.) O. Kuntze     | 11      | 0.3      | 4      | 0.3      | 27.1 | N        | N     |
| 142. | <i>Verbascum thapsus</i> L.                    | 15      | 0.4      | 2      | 0.1      | 25.4 | N        | N     |
| 143. | <i>Verbena officinalis</i> L.                  | 16      | 0.4      | 4      | 0.3      | 33.3 | N        | Y     |
| 144. | <i>Viola canescens</i> Wall.ex Roxb.           | 34      | 0.9      | 12     | 0.8      | 82.5 | N        | Y     |
| 145. | <i>Withania coolgulans</i> L.                  | 34      | 0.9      | 9      | 0.6      | 72.5 | N        | Y     |
| 146. | <i>Withania somnifera</i> (L.) Dunal.          | 32      | 0.8      | 11     | 0.7      | 76.7 | N        | Y     |
| 147. | <i>Zanthoxylum armatum</i> DC.                 | 29      | 0.7      | 13     | 0.9      | 79.6 | Y        | Y     |
| 148. | <i>Ziziphus mauritiana</i> Lam. var. Spontanea | 22      | 0.6      | 12     | 0.8      | 67.5 | Y        | Y     |
| 149. | <i>Ziziphus nummularia</i> (Burm.f.) W.A.      | 29      | 0.7      | 11     | 0.7      | 72.9 | Y        | N     |
| 150. | <i>Ziziphus jujuba</i> Mill.                   | 26      | 0.7      | 9      | 0.6      | 62.5 | Y        | N     |

<https://doi.org/10.1371/journal.pone.0243151.t005>

conservation of biocultural heritage by documentation. Following recommendations are suggested with future perspectives: (i) to document and preserve traditional ethnomedicines of the area as booklet form and analyze their dose optimization using latest protocols, (ii) to do further ethnopharmacological research on plants with high RPL, RFC and ROP to discover novel drugs (iii) to conserve rare and threatened medicinal plants of the area by using dedicated approaches involving concerned departments and indigenous people of the area, (iv) to provide practice measures for sustainable utilization of wild natural resources of the study and (v) to optimize and recommend herbal medicines to cure neo-emerging Covid-19 causing massive loss of lives around the globe. This and similar type of ethnomedicinal studies will make a pathway for discovering of novel drugs for mitigation and eradication of such fatal pandemic of Covid-19 through public message and track-path for future researchers.

## Supporting information

**S1 Questionnaire.**  
(DOCX)

## Author Contributions

**Conceptualization:** Humaira Khanam, Shehzad Azam, Khizar Hayat Bhatti, Abdul Ghani.

**Data curation:** Waheeda Mushtaq.

**Formal analysis:** Iqbal Hussain, Tanveer Hussain.

**Investigation:** Mehwish Maqbool, Abdul Ghani.

**Methodology:** Maqsood Ahmed.

**Software:** Khizar Hayat Bhatti.

**Supervision:** Muhammad Ajaib.

**Writing – original draft:** Muhammad Ishtiaq.

**Writing – review & editing:** Shehzad Azam.

## References

1. Zandial R. Ethnobotanical studies and population analysis of Machyara National Park Azad Kashmir. M.Sc. 1994; Thesis University of Azad Kashmir.

2. Hamayun M. Ethnobotanical profile of Utror and Gabral valleys, district Swat, Pakistan. *Ethnobotanical leaflets*. 2005; (1), 9.
3. Maqbool M, Ajaib M, Ishtiaq M, Azam S. Ethnomedicinal Study of Plants Used in Phytotherapeutics among Indigenous Communities of District Bhimber, Azad Kashmir and Migrants to United Kingdom. *Proceedings of the Pakistan Academy of Sciences: B. Life and Environmental Sciences*. 2019a; 56, (2): 55–74.
4. Kamal M, Wazir SM, Hassan M, Subhan M, Khan SU, Muhammad M, et al. Ethnobotanically important plants of district Bannu, Pakistan. *Pakistan Journal of Plant Science*. 2009; 15(2), 87–93.
5. Abbasi M A, Riaz T, Mahmood F, Jahangir M, Shahwar D, Ahmad N, et al. Chemical composition of *n*-hexane extract of Pakistani peanut and its antiradical activities, *Journal of Chemical Society of Pakistan*. 2009; 31(6), 955–960.
6. Azam S, Ishtiaq M, Maqbool M, Mushtaq W, Mehmood M, Azam A, et al. Antimicrobial Potential of Leaves of Four *Ficus* species from District Bhimber Azad Kashmir, Pakistan, *Pakistan Journal of Botany*. 2017; 49(SI): 211–220.
7. Njoroge G, Bussmann R, Gemmill B, Newton L, Ngumi V. Utilization of weed species as source of traditional medicines in central Kenya. *Lyonia*. 2004; 7: 71–87.
8. Mahmood A, Mahmood A, Malik RN, Shinwari ZK. Indigenous knowledge of medicinal plants from Gujranwala district, Pakistan. *Journal of Ethnopharmacology*. 2013; 148: 714–723. <https://doi.org/10.1016/j.jep.2013.05.035> PMID: 23707336
9. Cox PA. Will tribal knowledge survive the millennium? *Science*. 2000; 287: 44–45. <https://doi.org/10.1126/science.287.5450.44> PMID: 10644221
10. Gilani AH, Atta-ur-Rahman. Trends in ethnopharmacology. *Journal of Ethnopharmacology*. 2005; 100: 43–49. <https://doi.org/10.1016/j.jep.2005.06.001> PMID: 16127805
11. WHO. Traditional Medicines and Alternative Medicines. Geneva. 2002; Fact Sheet. No. 271.
12. Awang DV. Quality control and good manufacturing practices: Safety and efficacy of commercial herbs. *Food and Drug Law Journal*. 1997; 52(3), 341–344. PMID: 10343036
13. Abbasi MA, Arshad S, Riaz T, Zafar A, Aziz R, Siddiqui SZ, et al. In vitro Assessment of Relief to Oxidative Injury by different samples of *Xanthoxylum armatum*. *Asian Journal of Chemistry*. 2011b; 23 (8): 3353–3356.
14. Yuan H, Ma Q, Cui H, Liu G, Zhao X, Li W, et al. How can synergism of traditional medicines benefit from network pharmacology? *Molecules*. 2017; 22(7), 1135. <https://doi.org/10.3390/molecules22071135> PMID: 28686181
15. Ishtiaq M, Mehwish M, Tanveer H. Interrelationship of Cultural Diversity and Biodiversity and its impact on Conservation, District Bhimber Azad Kashmir, Pakistan. *Pakistan Journal of Botany*. 2012. 45 (157), 245–256.
16. Hussain F, Khaliq A. Ethnobotanical studies of some plants of Dabragai Hills, Swat. *Proceedings of First Training Workshop on Ethnobotany and its Application to Conservation*. NARC, Islamabad. 1996; 207–215.
17. Ishtiaq M, Mahmood A, Maqbool M. Indigenous knowledge of medicinal plants from Sudhanoti district (AJK), Pakistan. *Journal of Ethnopharmacology*. 2015; 168, 201–207. <https://doi.org/10.1016/j.jep.2015.01.054> PMID: 25666425
18. Ajaib M, Islam A, Sidiqi MF. A Contribution To Ethnobotanical Study of Wild Plants of Tehsil Jatlan Azad Jammu & Kashmir. *FUUAST Journal of Biology*. 2016; 6(2), 247–256.
19. Maqbool M, Ajaib M, Hayat BK, Ishtiaq M, Humaira K, Tanveer H, et al. Traditional knowledge based inventory of wild plants of Watala National Park and allied villages from Bhimber District, Azad Jammu and Kashmir, Pakistan. *Applied Ecology and Environmental Research*. 2019b; 17(5), 12023–12055.
20. Hayta S, Polat R, Selvi S. Traditional uses of medicinal plants in Elazığ (Turkey). *Journal of Ethnopharmacology*. 2014; 155: 171–184.
21. Colvard MD, Cordell GA, Villalobos R, Sancho G, Soejarto DD, Pestle W, et al. Survey of medical ethnobotanicals for dental and oral medicine conditions and pathologies. *Journal of Ethnopharmacology*. 2006; 107: 134–142. <https://doi.org/10.1016/j.jep.2006.04.005> PMID: 16735102
22. Farnsworth NR. Screening plants for new medicines. In: Wilson E.O., Ed., Chapter 9 in *Biodiversity*, National Academy Press, Washington DC 1988.
23. Purohit S, Vyas S. Medicinal Plant Cultivation: A Scientific Approach: Including Processing and Financial Guidelines. *Agrobios (India)*. 2004.
24. Parmesan C. Ecological and evolutionary responses to recent climate change. *Annual Review of Ecology, Evolution, and Systematics*. 2006; 637–669.
25. Govaerts R. How many species of seed plants are there? *Taxon*. 2001; 1085–1090.

26. Ibrar M, Hussain F, Sultan A. Ethnobotanical studies on plant resources of Ranyal hills, District Shangla, Pakistan. *Pakistan Journal of Botany*. 2007; 39: 329.
27. Amjad MS, Arshad M. Ethnobotanical inventory and medicinal uses of some important woody plant species of Kotli, Kashmir, Pakistan. *Asian Pacific Journal of Tropical Biomedicine*. 2014; 4, 952–958.
28. Amjad MS, Arshad M, Qureshi R. Ethnobotanical inventory and folk uses of indigenous plants from Pir Nasoora National Park, Azad Jammu and Kashmir. *Asian Pacific Journal of Tropical Biomedicine*. 2015; 5, 234–241.
29. Mahmood A, Qureshi RA, Mahmood A, Sangi Y, Shaheen H, Ahmad I. Ethnobotanical survey of common medicinal plants used by people of district Mirpur, AJK, Pakistan. *Journal of Medicinal Plants Research*. 2011b; 5, 4493–4498.
30. Khan MA, Khan MA, Hussain M. Ethnoveterinary medicinal uses of plants of Poonch valley Azad Kashmir. *Pakistan Journal of Weed Science Research*. 2012; 18, 495–507.
31. Ishtiaq M, Maqbool M, Hussain T, Azam S, Mushtaq W. Ethnomedico Profile of Indigenous flora of Tehsil Barnala, district Bhimber, Pakistan. *Journal of Medicinal Plants*. 2016; 3(2), 97–104.
32. Maqbool M, Ajaib M, Hayat BK, Ishtiaq M, Humaira K, Tanveer H, et al. Traditional knowledge based inventory of wild plants of Watala National Park and allied villages from Bhimber District, Azad Jammu and Kashmir, Pakistan. *Applied Ecology and Environmental Research*. 2019b; 17(5), 12023–12055.
33. Ishtiaq M, Maqbool M, Hussain T, Shah A. Role of indigenous knowledge in biodiversity conservation of an area: A case study on tree ethnobotany of Soona Valley, District Bhimber Azad Kashmir, Pakistan. *Pakistan Journal of Botany*. 2013b; 45(157), 245–256.
34. Mahmood A, Mahmood A, Shaheen H, Qureshi RA, Sangi Y, Gilani SA. Ethnomedicinal survey of plants from district Bhimber Azad Jammu and Kashmir, Pakistan. *Journal of Medicinal Plants Research*. 2011; 5(11), 2348–2360.
35. Ishtiaq M, Hanif W, Khan MA, Ashraf M, Butt AM. An ethnomedicinal survey and documentation of important medicinal folklore food phytonims of flora of Samahni valley, (Azad Kashmir) Pakistan. *Pakistan Journal Biological Sciences*. 2007a; 10(13), 2241–2256.
36. [www.pndajk.gov.pk](http://www.pndajk.gov.pk) > uploadfiles > downloads, 2011
37. Hussain T, Ishtiaq M. A floristic description of flora and ethnobotany of Samahni Valley (AK), Pakistan. *Ethnobotanical Leaflets*. 2009; 13:(7), 873–99.
38. Ishtiaq M, Mumtaz AS, Hussain T, Ghani A. Medicinal plant diversity in the flora of Leepa Valley, Muzaffarabad (AJK), Pakistan. *African Journal of Biotechnology*. 2012a; 11(13), 3087–3098.
39. Seshagirirao K, Harikrishnanaik L, Venumadhav K, Nanibabu B, Jamir K, Ratnamma BK, et al. 2016. Preparation of Herbarium Specimen for Plant Identification and Voucher Number, *Roxburghia* 6(1–4): 111–119.
40. Ishtiaq M, Khan MA, Hanif W. Ethnoveterinary medicinal uses of plants from Samahni valley dist. Bhimber, (Azad Kashmir) Pakistan. *Asian Journal of Plant Sciences*. 2006; 5(2), 390–396.
41. Ishtiaq M, Hanif W, Khan MA, Ashraf M, Butt AM. An ethnomedicinal survey and documentation of important medicinal folklore food phytonims of flora of Samahni valley, (Azad Kashmir) Pakistan. *Pakistan Journal Biological Sciences*. 2007a; 10(13), 2241–2256.
42. Stewart RR. History and Exploration of Plants in Pakistan & Adjoining Areas. National Herbarium, NARC, Islamabad, pp: 1982; 86–89.
43. Ali SI, Nasir YJ. eds. 1990–92. Flora of Pakistan. Nos 191–193. Department of Botany, University of Karachi and National Herbarium, PARC, Islamabad.
44. Ali SI, Omer S, Qaisar M. 2001. Flora of Pakistan: in Mohammad Afzal and Shehzad A Mufti (eds.). Natural History Research in Pakistan. PASTIC, Islamabad.
45. Ali SI. Significance of flora with special reference to Pakistan. *Pak. J. Bot.* 2008; 40(3): 967–971.
46. Ali, S.I. and Qaisar, M. eds. 1992–2009. Flora of Pakistan. Nos. 194–217. Department of Botany, University of Karachi and National Herbarium, PARC, Islamabad.
47. Ali SI, Qaisar M. 2009–15. Flora of West Pakistan and Kashmir. Flora of Pakistan. Department of Botany, University of Karachi and National Herbarium, PARC, Islamabad.
48. Ishtiaq M, Hussain A, Maqbool M, Mushtaq W, Azam A, Shahzaman M, et al. Comparative study on effect of auto-vehicular pollution on morphology and anatomy of two common plant species from Urban areas of Gujrat and Bhimber (AJK), Pakistan, *International Journal of Biosciences*. 2017; 10 (3), 265–274.
49. Olorode O. 1984. Taxonomy of West African flowering plants, London; New York: Longman.
50. Ishtiaq M, Qing H, Wang Y, Cheng YY. A comparative study using chemometric and numerical taxonomic approaches in the identification and classification of traditional Chinese medicines of the genus *Clematis*. *Plant Biosystems*. 2010; 144(2), 288–297.

51. Stevens PF (2001 onwards) Angiosperm Phylogeny Website Version 12, July 2012.
52. Cook FE. 1995. Economic botany data collection standard. Royal Botanic Gardens (Kew).
53. Mesfin F, Demissew S, Teklehaymanot T. An ethnobotanical study of medicinal plants in Wonago Woreda, SNNPR, Ethiopia. *Journal of Ethnobiology and Ethnomedicine*. 2009; 5(1), 28. <https://doi.org/10.1186/1746-4269-5-28> PMID: 19821994
54. Heinrich M., Rimpler H. and Barrera N.A., 1992. Indigenous phytotherapy of gastrointestinal disorders in a lowland Mixe community (Oaxaca, Mexico): Ethnopharmacologic evaluation. *Journal of Ethnopharmacology*, 36(1), 63–80. [https://doi.org/10.1016/0378-8741\(92\)90062-v](https://doi.org/10.1016/0378-8741(92)90062-v) PMID: 1501495
55. Trotter RT, Logan MH. Informant consensus: a new approach for identifying potentially effective medicinal plants. In: Etkin NLE, editor. *Plants in Indigenous Medicine and Diet*, Bio behavioural Approaches. Bedford Hills, NY: Redgrave Publishers 1986.
56. Heinrich M, Ankli A, Frei B, Weimann C, Sticher O. Medicinal plants in Mexico: Healers' consensus and cultural importance. *Social Science and Medicine*. 1998; 47: 1859–1871. [https://doi.org/10.1016/S0277-9536\(98\)00181-6](https://doi.org/10.1016/S0277-9536(98)00181-6) PMID: 9877354
57. Amjad MS, Qaeem FM, Ahmad I, Khan SU, Chaudhari SK, Malik NZ, et al. Descriptive study of plant resources in the context of the ethnomedicinal relevance of indigenous flora: A case study from Toli Peer National Park, Azad Jammu and Kashmir, Pakistan. *PLOS ONE*. 2017; 12(2), 1–31.
58. Friedman J, Yaniv Z, Dafni A, Palewitch D. A preliminary classification of the healing potential of medicinal plants, based on a rational analysis of an ethnopharmacological field survey among Bedouins in the Negev Desert, Israel. *Journal of ethnopharmacology*. 1986; 16(2–3), 275–287. [https://doi.org/10.1016/0378-8741\(86\)90094-2](https://doi.org/10.1016/0378-8741(86)90094-2) PMID: 3747566
59. Ali-Shtayah MS, Yaniv Z, Mahajna J. Ethnobotanical survey in the Palestinian area: a classification of the healing potential of medicinal plants. *Journal of Ethnopharmacology*. 2000; 73(1–2), 221–232. [https://doi.org/10.1016/S0378-8741\(00\)00316-0](https://doi.org/10.1016/S0378-8741(00)00316-0) PMID: 11025160
60. Umair M, Altaf M, Abbasi AM. An ethnobotanical survey of indigenous medicinal plants in Hafizabad district, Punjab-Pakistan. *PIOS ONE*. 2017; 12(6), 1–22. <https://doi.org/10.1371/journal.pone.0177912> PMID: 28574986
61. Rehman MN, Ahmad M, Sultana S, Zafar M, Edwards S. Relative popularity level of medicinal plants in Talagang, Punjab Province, Pakistan. *Revista Brasileira de Farmacognosia*. 2017; 27(6), 751–775.
62. Vijayakumar S, Yabesh JM, Prabhu S, Manikandan R, Muralidharan B. Quantitative ethnomedicinal study of plants used in the Nelliampathy hills of Kerala, India. *Journal of ethnopharmacology*. 2015; 161, 238–254. <https://doi.org/10.1016/j.jep.2014.12.006> PMID: 25529616
63. Ilker U, Suleyman B, Nurettin Y, Yunus D. The investigation and quantitative ethnobotanical evaluation of medicinal plants used around Izmir province, Turkey. *Journal of Medicinal Plants Research*. 2009; 3: 345–367.
64. Vitalini S, Iriti M, Puricelli C, Ciuchi D, Segale A, Fico G. Traditional knowledge on medicinal and food plants used in Val San Giacomo (Sondrio, Italy)-An alpine ethnobotanical study. *Journal of Ethnopharmacology*. 2013; 145: 517–529. <https://doi.org/10.1016/j.jep.2012.11.024> PMID: 23220197
65. Kadir MF, Bin Sayeed MS, Mia M. Ethnopharmacological survey of medicinal plants used by indigenous and tribal people in Rangamati, Bangladesh. *Journal of Ethnopharmacology*. 2012; 144: 627–637. <https://doi.org/10.1016/j.jep.2012.10.003> PMID: 23064284
66. Cakilcioglu U, Khatun S, Turkoglu I, Hayta S. Ethnopharmacological survey of medicinal plants in Maden (Elazig-Turkey). *Journal of Ethnopharmacology*. 2011; 137: 469–486. <https://doi.org/10.1016/j.jep.2011.05.046> PMID: 21704144
67. Abbasi AM, Khan SM, Ahmad M, Khan MA, Quave CL, Pieroni A. Botanical ethnoveterinary therapies in three districts of the Lesser Himalayas of Pakistan. *Journal of ethnobiology and ethnomedicine*. 2013b; 9, 84.
68. Kayani S, Ahmad M, Zafar M, Sultana S, Khan MP, Ashraf MA. Ethnobotanical uses of medicinal plants for respiratory disorders among the inhabitants of Gallies, Abbottabad, Northern Pakistan. *Journal of ethnopharmacology*. 2014; 156, 47–60. <https://doi.org/10.1016/j.jep.2014.08.005> PMID: 25153021
69. Bolson M, Hefler SR, Chaves EIDO, Junior AG, Junior ELC. Ethno-medicinal study of plants used for treatment of human ailments, with residents of the surrounding region of forest fragments of Parana Á, Brazil. *Journal of Ethnopharmacology*. 2014; 161: 1–10. <https://doi.org/10.1016/j.jep.2014.11.045> PMID: 25482361
70. Ayyanar M, Ignacimuthu S. Ethnobotanical survey of medicinal plants commonly used by Kani tribals in Tirunelveli hills of Western Ghats, India. *Journal of Ethnopharmacology*. 2011; 134: 851–864. <https://doi.org/10.1016/j.jep.2011.01.029> PMID: 21291981

71. Ju Y, Zhuo J, Liu B, Long C. Eating from the wild: diversity of wild edible plants used by Tibetans in Shangri-la region, Yunnan, China. *Journal of Ethnobiology and Ethnomedicine*. 2013; 9: 28 <https://doi.org/10.1186/1746-4269-9-28> PMID: 23597086
72. Mugisha MK, Asiimwe S, Namutebi A, Borg-Karlson A-K, Kakudidi EK. Ethnobotanical study of indigenous knowledge on medicinal and nutritious plants used to manage opportunistic infections associated with HIV/AIDS in western Uganda. *Journal of Ethnopharmacology*. 2014; 155: 194–202. <https://doi.org/10.1016/j.jep.2014.05.012> PMID: 24862490
73. Tabuti J, Lye K, Dhillon S. Traditional herbal drugs of Bulamogi, Uganda: plants, use and administration. *Journal of Ethnopharmacology*. 2003; 88: 19–44. [https://doi.org/10.1016/s0378-8741\(03\)00161-2](https://doi.org/10.1016/s0378-8741(03)00161-2) PMID: 12902048
74. Ahmed E, Arshad M, Saboor A, Qureshi R, Mustafa G, Sadiq S, et al., Ethnobotanical appraisal and medicinal use of plants in Patriata, New Murree, evidence from Pakistan. *Journal of Ethnobiology and Ethnomedicine*. 2013; 9: 13. <https://doi.org/10.1186/1746-4269-9-13> PMID: 23445756
75. Moerman DE. An analysis of the food plants and drug plants of native North America. *Journal of Ethnopharmacology*. 1996; 52: 1–22. [https://doi.org/10.1016/0378-8741\(96\)01393-1](https://doi.org/10.1016/0378-8741(96)01393-1) PMID: 8733114
76. Shinwari MI, Khan MA. Folk use of medicinal herbs of Margalla hills national park, Islamabad. *Journal of Ethnopharmacology*. 2000; 69: 45–56. [https://doi.org/10.1016/s0378-8741\(99\)00135-x](https://doi.org/10.1016/s0378-8741(99)00135-x) PMID: 10661883
77. Bradacs G, Heilmann J, Weckerle CS. Medicinal plant use in Vanuatu: A comparative ethnobotanical study of three islands. *Journal of Ethnopharmacology*. 2011; 137: 434–448. <https://doi.org/10.1016/j.jep.2011.05.050> PMID: 21679762
78. Leto C, Tuttolomondo T, La Bella S, Licata M. Ethnobotanical study in the Madonie Regional Park (Central Sicily, Italy) Medicinal use of wild shrub and herbaceous plant species. *Journal of Ethnopharmacology*. 2013; 146: 90–112. <https://doi.org/10.1016/j.jep.2012.11.042> PMID: 23276781
79. Bernhoft A. Bioactive compounds in plants Benefits and risks for man and animals. The Norwegian Academy of Science and Letters, Oslo 2010.
80. Bibi T, Ahmad M, Tareen RB, Tareen NM, Jabeen R, Rehman S, et al. Ethnobotany of medicinal plants in district Mastung of Baluchistan province-Pakistan. *Journal of Ethnopharmacology*. 2014; 157: 79–89. <https://doi.org/10.1016/j.jep.2014.08.042> PMID: 25260579
81. Ahmad M, Sultana S, Fazl-i-Hadi S, ben Hadda T, Rashid S, Zafar M, et al. An Ethnobotanical study of Medicinal Plants in high mountainous region of Chail valley (District Swat-Pakistan). *Journal of Ethnobiology and Ethnomedicine*. 2014; 10: 36. <https://doi.org/10.1186/1746-4269-10-36> PMID: 24739524
82. Sarić-Kundalić B, Dobesl C, Klatte-Asselmeyer V, Saukel J. Ethnobotanical study on medicinal use of wild and cultivated plants in middle, south and west Bosnia and Herzegovina. *Journal of Ethnopharmacology*. 2010; 131: 33–55. <https://doi.org/10.1016/j.jep.2010.05.061> PMID: 20594943
83. Belayneh A, Bussa NF. Ethnomedicinal plants used to treat human ailments in the prehistoric place of Harla and Dengego valleys, eastern Ethiopia. *Journal of Ethnobiology and Ethnomedicine*. 2014; 10. <https://doi.org/10.1186/1746-4269-10-18> PMID: 24499509
84. Song M-J, Kim H, Heldenbrand B, Jeon J, Lee S. Ethnopharmacological survey of medicinal plants in Jeju Island, Korea. *Journal of Ethnobiology and Ethnomedicine*. 2013; 9: 48. <https://doi.org/10.1186/1746-4269-9-48> PMID: 23837693
85. Manandhar NP. An inventory of some herbal drugs of Myagdi District, Nepal. *Economic Botany*. 1995; 49: 371–379.
86. Inta A, Trisonthi P, Trisonthi C. Analysis of traditional knowledge in medicinal plants used by Yuan in Thailand. *Journal of Ethnopharmacology*. 2013; 149: 344–351. <https://doi.org/10.1016/j.jep.2013.06.047> PMID: 23850711
87. Boudjelal A, Henchiri C, Sari M, Sarri D, Hendel N, Benkhaled A. et al. Herbalists and wild medicinal plants in M'Sila (North Algeria): An ethnopharmacology survey. *Journal of Ethnopharmacology*. 2013; 148: 395–402. <https://doi.org/10.1016/j.jep.2013.03.082> PMID: 23643544
88. Ssegawa P, Kasenene JM. Medicinal plant diversity and uses in the Sango bay area, Southern Uganda. *Journal of Ethnopharmacology*. 2007; 113: 521–540. <https://doi.org/10.1016/j.jep.2007.07.014> PMID: 17720338
89. Rokaya MB, MuĖnzbergovaĀ Z, Timsina B. Ethnobotanical study of medicinal plants from the Humla district of western Nepal. *Journal of Ethnopharmacology*. 2010; 130: 485–504. <https://doi.org/10.1016/j.jep.2010.05.036> PMID: 20553834
90. Cechinel-Filho V. Plant bioactives and drug discovery: principles, practice, and perspectives: John Wiley & Sons 2012.

91. Ignacimuthu S, Ayyanar M. Ethnobotanical investigations among tribes in Madurai district of Tamil Nadu (India). *Journal of Ethnobiology and Ethnomedicine*. 2006; 2: 25. <https://doi.org/10.1186/1746-4269-2-25> PMID: 16689985
92. Luitel DR, Rokaya MB, Timsina B, MuÈnzbergovaÅ Z. Medicinal plants used by the Tamang community in the Makawanpur district of central Nepal. *Journal of Ethnobiology and Ethnomedicine*. 2014; 10: 5. <https://doi.org/10.1186/1746-4269-10-5> PMID: 24410808
93. Revathi P, Parimelazhagan T, Manian S. Ethnomedicinal plants and novel formulations used by Hooralis tribe in Sathyamangalam forests, Western Ghats of Tamil Nadu, India. *Journal of Medicinal Plants Research*. 2013; 7: 2083–2097.
94. De Wet H, Nciki S, van Vuuren SF. Medicinal plants used for the treatment of various skin disorders by a rural community in northern Maputaland, South Africa. *Journal of Ethnobiology and Ethnomedicine*. 2013; 9: 51. <https://doi.org/10.1186/1746-4269-9-51> PMID: 23870616
95. Frei B, Baltisberger M, Sticher O, Heinrich M. Medical ethnobotany of the Zapotecs of the Isthmus-Sierra (Oaxaca, Mexico): Documentation and assessment of indigenous uses. *Journal of Ethnopharmacology*. 1998; 62: 149–165. [https://doi.org/10.1016/s0378-8741\(98\)00051-8](https://doi.org/10.1016/s0378-8741(98)00051-8) PMID: 9741887
96. Singh H, Husain T, Agnihotri P, Pande P, Khatoon S. An ethnobotanical study of medicinal plants used in sacred groves of Kumaon Himalaya, Uttarakhand, India. *Journal of Ethnopharmacology*. 2014; 154: 98–108. <https://doi.org/10.1016/j.jep.2014.03.026> PMID: 24685588
97. Zheng XL, Wei JH, Sun W, Li RT, Liu SB, Dai HF. Ethnobotanical study on medicinal plants around Limu Mountains of Hainan Island, China. *Journal of Ethnopharmacology*. 2013; 148: 964–974. <https://doi.org/10.1016/j.jep.2013.05.051> PMID: 23751393
98. Kaval I, BehcÈet L, Cakilcioglu U. Ethnobotanical study on medicinal plants in GeçÈitli and its surrounding (Hakkari-Turkey). *Journal of Ethnopharmacology*. 2014; 155: 171–184. <https://doi.org/10.1016/j.jep.2014.05.014> PMID: 24911339
99. Ishtiaq M, Maqbool M, Hussain T. Interrelationship of cultural diversity and biodiversity and its impact on conservation. *Pakistan Journal of Botany*. 2012c; 44, 245–256.
100. Hussain T, Gupta RK, Sweetey K, Khan MS, Hussain MS, Arif MD, et al. Evaluation of antihepatotoxic potential of *Solanum xanthocarpum* fruit extract against antitubercular drugs induced hepatopathy in experimental rodents. *Asian Pacific Journal of Tropical Biomedicine*. 2012; 2: 454–460. [https://doi.org/10.1016/S2221-1691\(12\)60075-6](https://doi.org/10.1016/S2221-1691(12)60075-6) PMID: 23569949
101. Govindan S, Viswanathan S, Vijayasekaran V, Alagappan R. A pilot study on the clinical efficacy of *Solanum xanthocarpum* and *Solanum trilobatum* in bronchial asthma. *Journal of Ethnopharmacology*. 1999; 66: 205–210. [https://doi.org/10.1016/s0378-8741\(98\)00160-3](https://doi.org/10.1016/s0378-8741(98)00160-3) PMID: 10433479
102. Pardhi P, Jain AP, Ganeshpurkar A, Rai G. Anti-microbial, anti-oxidant and anthelmintic activity of crude extract of *Solanum xanthocarpum*. *Pharmacognosy Journal*. 2010; 2: 400–404.
103. Kumar N, Prakash D, Kumar P. Wound healing activity of *Solanum xanthocarpum* Schrad. & Wendl. fruits. *Indian Journal of Natural Product and Resources*. 2010; 1(4): 470–475.
104. Patel P, Patel M, Saralai M, Gandhi T. Antiuro lithiatic effects of *Solanum xanthocarpum* fruit extract on ethylene-glycol-induced nephrolithiasis in rats. *Journal of Young Pharmacists*. 2012; 4: 164–170. <https://doi.org/10.4103/0975-1483.100022> PMID: 23112535
105. Singh OM, Singh TP. Phytochemistry of *Solanum xanthocarpum*: an amazing traditional healer. *Journal of Scientific and Industrial Research*. 2010; 69(10): 732–740.
106. Devi PU, Sharada A, Solomon F. Antitumor and radio sensitizing effects of *Withania somnifera* (Ashwagandha) on a transplantable mouse tumor, Sarcoma-180. *Indian Journal of Experimental Biology*. 1993; 31: 607–611. PMID: 8225418
107. Lai Y-J, Tai C-J, Wang C-W, Choong C-Y, Lee B-H, Shi YC, et al. Anti-cancer activity of *Solanum nigrum* (AESN) through suppression of mitochondrial function and epithelial-mesenchymal transition (EMT) in breast cancer cells. *Molecules*. 2016; 21: 553.
108. Srithi K, Balslev H, Wangpakapattanawong P, Srisanga P, Trisonthi C. Medicinal plant knowledge and its erosion among the Mien (Yao) in northern Thailand. *Journal of Ethnopharmacology*. 2009; 123: 335–342. <https://doi.org/10.1016/j.jep.2009.02.035> PMID: 19429381
109. Padmavathi B, Rath PC, Rao AR, Singh RP. Roots of *Withania somnifera* inhibit forestomach and skin carcinogenesis in mice. *Evidence-Based Complementary and Alternative Medicine*. 2005; 2: 99–105. <https://doi.org/10.1093/ecam/neh064> PMID: 15841284
110. Mikawlrang K, Kumar S. Current scenario of urolithiasis and the use of medicinal plants as antiuro lithiatic agents in Manipur (North East India): a review. *International Journal of Herbal Medicine*. 2014; 2: 1–12.
111. Khan MA, Khan MA, Hussain M. Ethnoveterinary medicinal uses of plants of Poonch valley Azad Kashmir. *Pakistan Journal of Weed Science Research*. 2012.; 18, 495–507.

112. Khan MA. 2008. Biodiversity and Ethnobotany of Himalayan Region Poonch Valley, Azad Kashmir Pakistan. Ph.D Thesis. Quaid-iAzam University Islamabad, Pakistan. 241pp.
113. Faiz AH, Ghufarn MA, Mian A, Akhtar T. Floral Diversity of Tolipir National Park (TNP), Azad Jammu and Kashmir, Pakistan. *Biologia (Pakistan)*. 2014; 60 (1), 43–55.
114. Khan MA, Hussain M, Mujtaba G. An Ethnobotanical Inventory of Himalayan Region Poonch Valley Azad Kashmir (Pakistan). *Ethnobotany Research & Applications*. 2010; 8: 107–123.
115. Kayani S, Ahmad M, Sultana S, Shinwari ZK, Zafar M, Yaseen G. Ethnobotany of medicinal plants among the communities of Alpine and Sub-alpine regions of Pakistan. *Journal of Ethnopharmacology*. 2015; 164: 186–202. <https://doi.org/10.1016/j.jep.2015.02.004> PMID: 25680839
116. Mahmood A, Malik RN, Shinwari ZK, Mahmood A. Ethnobotanical survey of plants from Nellum Valley, Azad Jammu and Kashmir, Pakistan. *Pak. J. Bot.* 2011; 43: 105–110.
117. Ishtiaq M, Mumtaz AS, Hussain T, Ghani A. Medicinal plant diversity in the flora of Leepa Valley, Muzaffarabad (AJK), Pakistan. *African Journal of Biotechnology*. 2012b. 11, 3087–3098.
118. Budhiraja R, Sudhir S. Review of biological activity of with anolides. *Journal of Scientific and Industrial Research* 1987.
119. Ali H, Kaiser M. The ethnobotany of Chitral valley, Pakistan with particular reference to medicinal plants. *Pakistan Journal of Botany*. 2009; 41, 2029–2041.
120. Alam N, Shinwari Z, Ilyas M, Ullah Z. Indigenous knowledge of medicinal plants of Chagharzai valley, District Buner, Pakistan. *Pakistan Journal of Botany*. 2011; 43, 773–780.
121. Arshad M, Ahmad M, Ahmed E, Saboor A, Abbas A, Sadiq S. An ethnobiological study in Kala Chitta hills of Pothwar region, Pakistan: multinomial logit specification. *Journal of Ethnobiology and Ethnomedicine*. 2014; 10, 13. <https://doi.org/10.1186/1746-4269-10-13> PMID: 24467739
122. Husain SZ, Malik RN, Javaid M, Bibi S. Ethnobotanical properties and uses of medicinal plants of Morgah biodiversity park, Rawalpindi. *Pakistan Journal of Botany*. 2008; 40, 1897–1911.
123. Mahmood A, Mahmood A, Tabassum A. Ethnomedicinal survey of plants from District Sialkot, Pakistan. *Journal of Applied Pharmacy*. 2011a; 2, 212–220.
124. Ahmad M, Sultana S, Fazl-i-Hadi S, Ben Hadda T, Rashid S, Zafar K. An Ethnobotanical study of Medicinal Plants in high mountainous region of Chail valley (District Swat-Pakistan). *Journal of Ethnobiology and Ethnomedicine*. 2014; 10, 4269–4210.
125. Bhatti GR, Qureshi R, Shah M. Ethnobotany of Qadanwari of Nara Desert. *Pakistan Journal of Botany*. 2001; 801–812 (Special issue).
126. Qureshi R. Ethnobotany of Rohri Hills, Sindh, Pakistan. *Hamdard Medicus*. 2002; 45 (3), 86–94.
127. Khan SW, Khatoon S. Ethnobotanical studies in Haramosh and Bugrote Valleys (Gilgit). *International Journal of Biotechnology*. 2004; 1 (4), 584–589.
128. Qureshi R, Bhatti GR. Ethnobotany of plants used by the Thari people of Nara Desert, Pakistan. *Fito-terapia*. 2008; 79, 468–473. <https://doi.org/10.1016/j.fitote.2008.03.010> PMID: 18538950
129. Shinwari ZK. Medicinal plants research in Pakistan. *Journal of Medicinal Plants Research*. 2010; 4 (3), 161–176.
130. Farooq S, Barki A, Yousaf KM, Fazal H. Ethnobotanical studies of the flora of Tehsil Birma in South Waziristan Agency, Pakistan. *Pakistan Journal of Weed Science Research*. 2012; 18, 277–291.
